1 Article

# 2 Multimodal-Multisensory Experiments: Design and 3 Implementation

4 Moein Razavi <sup>1</sup>, Takashi Yamauchi <sup>1\*</sup>, Vahid Janfaza <sup>2</sup>, Anton Leontyev <sup>1</sup>, Shanle Longmire-Monford  
5 <sup>1</sup>, Joseph Orr <sup>1</sup>

6 <sup>1</sup> Department of Psychological and Brain Sciences, Texas A&M University; [moeinrazavi@tamu.edu](mailto:moeinrazavi@tamu.edu), [takashi-](mailto:takashi-yamauchi@tamu.edu)  
7 [yamauchi@tamu.edu](mailto:yamauchi@tamu.edu), [a.g.leontiev@tamu.edu](mailto:a.g.leontiev@tamu.edu), [college4me@tamu.edu](mailto:college4me@tamu.edu), [joseph.orr@tamu.edu](mailto:joseph.orr@tamu.edu)

8 <sup>2</sup> Department of Computer Science and Engineering, Texas A&M University; [vahidjanfaza@tamu.edu](mailto:vahidjanfaza@tamu.edu)

9 \* Correspondence: [takashi-yamauchi@tamu.edu](mailto:takashi-yamauchi@tamu.edu); Tel.: +1-979-845-2503

10 Received: date; Accepted: date; Published: date

11 **Abstract:** The human mind is multimodal. Yet most behavioral studies rely on century-old measures  
12 of behavior - task accuracy and latency (response time). Multimodal and multisensory analysis of  
13 human behavior creates a better understanding of how the mind works. The problem is that  
14 designing and implementing these experiments is technically complex and costly. This paper  
15 introduces versatile and economical means of developing multimodal-multisensory human  
16 experiments. We provide an experimental design framework that automatically integrates and  
17 synchronizes measures including electroencephalogram (EEG), galvanic skin response (GSR), eye-  
18 tracking, virtual reality (VR), body movement, mouse/cursor motion and response time. Unlike  
19 proprietary systems (e.g., iMotions), our system is free and open-source; it integrates **PsychoPy**,  
20 **Unity** and Lab Streaming Layer (LSL). The system embeds LSL inside **PsychoPy/Unity** for the  
21 synchronization of multiple sensory signals - gaze motion, electroencephalogram (EEG), galvanic  
22 skin response (GSR), mouse/cursor movement, and body motion - with low-cost consumer-grade  
23 devices in a simple behavioral task designed by **PsychoPy** and a virtual reality environment  
24 designed by **Unity**. This tutorial shows a step-by-step process by which a complex multimodal-  
25 multisensory experiment can be designed and implemented in a few hours. When conducting the  
26 experiment, all of the data synchronization and recoding of the data to disk will be done  
27 automatically.

28 **Keywords:** multimodal experiment; multisensory experiment; automatic device integration; open-  
29 source; PsychoPy; Unity; Virtual Reality (VR); Lab Streaming Layer (LSL); LabRecorder;  
30 LabRecorderCLI; Windows command line (cmd.exe)

31

---

## 32 1. Introduction

### 33 1.1. The mind is multimodal

34 Psychology is the scientific study of the brain, mind and behavior. The brain supervises different  
35 autonomic functions such as cardiac activity, respiration, perspiration, etc. Current methods to study  
36 human behavior include self-report, observation, task performance, gaze, gait and body motion, and  
37 physiological measures such as electroencephalogram (EEG), electrocardiogram (ECG), functional  
38 magnetic resonance imaging (fMRI). These measures are indicators of human behavior; however, the  
39 gap here is that they are mostly studied separately from each other, while human behavior is  
40 inherently multimodal and multisensory, where different measures are connected and dependent on  
41 each other. Signals from multiple sources have overlap in locations (spatial) or timing (temporal) in  
42 the brain; hence, a single measurement cannot be as informative as multiple measurements in  
43 distinguishing between different functions [1].

44 A more accurate behavioral measurement needs different measures to be recorded and analyzed  
45 concurrently [2]. Hochenberger (2015) suggests that multimodal experiments facilitate the perception  
46 of senses that operate in parallel [3]. Similar to using multiple classifiers to improve accuracy in a  
47 classification task, combining different measures in studies of brain functionality and its association  
48 with behavior helps improve the predictions of human behavior [4].

49 Designing and developing a multimodal and multisensory study is complicated and costly. All  
50 events and time series must be recorded and timestamped together; data from multiple  
51 measurements and multiple subjects should be stored in an easily accessible and analyzable format.  
52 All the devices must start recording at the same time without the effort of running the devices one  
53 by one. For psychological and cognitive science experiments, an instant and easy to setup system is  
54 vital, due to the need to collect data from a large group of participants (around 50-60 participants).

55 There are several proprietary systems that ease multimodal-multisensory experimentation (e.g.,  
56 iMotions). Yet, it is costly and challenging to integrate different devices with these systems. Due to  
57 limitations of proprietary software the stimulus presentation and data acquisition should be in  
58 different software which makes it difficult for 1) synchronization (since different software may have  
59 different processing times which results in different delays) and 2) instant and easy experiment setup.  
60 Here we present a system that allows stimulus presentation, data acquisition and recording in the  
61 same [opensource] software and how to make this process automatic and adaptable for various  
62 multimodal-multisensory experiments.

63 **Contributions.** To summarize, this paper makes the following contributions.

- 64 • For psychological and cognitive science experiments, an instant and easy-to-setup system that  
65 can be used for multimodal-multisensory experiments is vital. We have designed a  
66 comprehensive, customizable and fully opensource system in **PsychoPy** and **Unity** platforms  
67 which can be used for that purpose. To the best of our knowledge, our system is the first of this  
68 kind.
- 69 • We have provided a tutorial on how to make stimulus presentation and data acquisition in the  
70 same [opensource] software and how to make the process of synchronizing multiple sensors,  
71 devices and markers (from environment and the user response) and saving the data on disk  
72 automatically.
- 73 • We have created several applications and also customized the SDKs of different devices to create  
74 multimodal-multisensory experiments using LSL and made the source files open access. By  
75 studying the source files, users will find how to customize their devices' SDKs for this purpose.
- 76 • Due to limitation of the proprietary systems for supporting different devices, we have provided  
77 a platform which makes it possible for all opensource devices to be synchronized together  
78 automatically. Also, with the aid of our system, all non-opensource devices which can send data  
79 to one of the opensource platforms such as C, C++, C#, Python, Java and Octave can be  
80 synchronized.

81 In what follows, section 1.2 reviews previous works and their findings that elucidate the  
82 importance of using multisensory experiments. Section 2 discusses major challenges of implementing  
83 multisensory experiments and the available methods of addressing those challenges. Section 3  
84 presents an overview of the tools and methods utilized in the proposed system. Sections 4 and 5,  
85 provide a step-by-step tutorial on developing multimodal/multisensory experiments in **PsychoPy**  
86 and **Unity** platforms, respectively. Finally, section 6 presents the results and discusses the cases of  
87 use and potential future works.

## 88 1.2. Related Work

89 Although many past studies provided useful information about human behavior using only a  
90 single source, multiple sources are involved with actual behavior in the natural environment [5]. A  
91 few studies tried to integrate multiple measures into the experimental psychology/neuroscience  
92 portal. Reeves et al. (2007) state the importance of using multiple measures in the goals of Augmented  
93 Cognition (AUGCOG) [6]; they discuss the combination of multiple measures together as a factor for

94 the technologies that improve Cognitive State Assessment (CSA). Jimenez-Molina et al. (2018)  
95 showed that analyzing all measures of electrodermal activity (EDA), photoplethysmogram (PPG),  
96 EEG, temperature and pupil dilation at the same time, significantly improves the classification  
97 accuracy in a web-browsing workload classification task, compared to using a single measure or a  
98 combination of some of them [7].

99 Several studies to date have put these recommendations to work by integrating several measures  
100 concurrently. Born et al. (2019) used EEG, GSR and eye-tracking to predict task performance in a task  
101 load experiment; they found that low-beta frequency bands, pupil dilations and phasic components  
102 of GSR were correlated with task difficulty [8]. They also showed that the statistical results of  
103 analyzing EEG and GSR together were more reliable than analyzing them individually. Leontyev et  
104 al. combined user response time and mouse movement features with machine learning technics and  
105 found an improvement in the accuracy of predicting attention-deficit/hyperactivity disorder (ADHD)  
106 [9–11]. Yamauchi et al. combined behavioral measures and multiple mouse motion features to better  
107 predict people's emotions and cognitive conflict in computer tasks [12,13]. Yamauchi et al. further  
108 demonstrated that people's emotional experiences change as their tactile sense (touching a plant) was  
109 augmented with visual sense ("seeing" their touch) in a multisensory interface system [14]. Chen et  
110 al. (2012) tried to identify possible correlations between increasing levels of cognitive demand and  
111 modalities from speech, digital pen, and freehand gesture to eye activity, galvanic skin response, and  
112 EEG [15]. Lazzeri et al. (2014) used physiological signals, eye gaze, video and audio acquisition to  
113 perform an integrated affective and behavioral analysis in Human-Robot Interaction (HRI) [16]; by  
114 acquiring synchronized data from multiple sources, they investigated how autism patients can  
115 interact with affective robots. Charles and Nixon (2019) reviewed 58 articles on mental workload  
116 tasks. They found that physiological measurements such as ECG, respiration, GSR, blood pressure,  
117 EOG and EEG need to be triangulated because though they are sensitive to mental workload, no  
118 single measure satisfies to predict mental workload [17]. Lohani et al. (2019) suggest that analyzing  
119 multiple measures such as head movement together with physiological measures (e.g., EEG, heart  
120 rate, etc.) can be used for the drivers to detect cognitive states (e.g., distraction) [18]. Gibson et al.  
121 (2014) integrated questionnaires, qualitative methods, and physiological measures including ECG,  
122 respiration, electrodermal activity (EDA) and skin temperature to study activity settings in disabled  
123 youth [19]; they stated that using multiple measures reflects a better real-world setting of the youth  
124 experiences. Sciarini and Nicholson (2009) used EEG, eye blink, respiration, cardiovascular activity  
125 and speech measures in a workload task performance [20]; as they outlined, using only one measure  
126 is not sufficient in the multidimensional tasks in a dynamic environment. Thus, multiple measures  
127 should be considered. The authors also highlighted the lack of clear guidance on how to integrate  
128 different systems as an important issue.

129 Integrating multiple measurements is quite complicated. Although the aforementioned studies  
130 integrated multiple measures, they did not synchronize these measures together. They have different  
131 sampling rates and also lack a coherent and easy to implement method for combining the measures.  
132 Asynchronized multiple measurs are prone to error and make it difficult to assess their interactions  
133 with each other.

134 The following section provides a summary of the challenges for device integration and different  
135 methods of addressing them.

## 136 **2. Multisensory Experiments**

### 137 *2.1. Challenges of Implementation*

138 There are several challenges to be addressed during the integration process:

- 139 1. All events and time series must be recorded and timestamped together, with the same timing  
140 reference, to be analyzable.
- 141 2. Because multiple subjects ( $N > 50$ ) are needed in psychological experiments for statistical  
142 analysis, data from multiple measures and multiple subjects should be stored in a format that  
143 can be easily analyzed together.

144 3. A method should be used to record the data from all the devices simultaneously without the  
145 need to run the devices one by one.

146 For the first challenge, UDP (User Datagram Protocol) and TCP (Transmission Control Protocol)  
147 offer potential solutions. However, UDP is unreliable since it is a connectionless protocol that does  
148 not guarantee data delivery, order, or duplicate protection. On the other hand, TCP is a connection-  
149 oriented protocol that guarantees errorless, reliable and ordered data streaming and it works with  
150 internet protocol (IP) for data streaming. Thus, for reliable data transport, TCP is preferred.

151 For the second and third challenges, there are at least two options. One is to use proprietary  
152 software (e.g., iMotions, Biopac, etc.) which has its own advantages. For example, it has extensive  
153 support and is relatively easy to implement. However, proprietary software is costly and restrictive;  
154 it often forces the researchers to purchase other proprietary devices that are functional only for that  
155 particular software design. Because of that, the users are limited in the number of experimental  
156 manipulations they can introduce. Finally, proprietary software developers often charge steep  
157 licensing fees, which limit people's access (especially in developing countries). Thus, it is imperative  
158 to devise a system that will address the problem of simultaneous observation, but that is also  
159 accessible to everyone.

160 Another method, which is more versatile and preferred, is to employ opensource tools that are  
161 available for multiple platforms (e.g., LSL). LSL (<https://github.com/scn/labstreaminglayer/wiki>) is  
162 available on almost all open-source platforms including, Python, C, C++, C#, Java, Octave, etc.  
163 Currently, the majority of the consumer and research-grade devices support LSL. Above all, as long  
164 as these devices are capable of sending their data to the platforms like Python, C, MATLAB, etc., LSL  
165 can be used for streaming their data. LSL uses TCP for stream transport and UDP for stream  
166 discovery and time synchronization.

167 LSL is developed by the Swartz Center for Computational Neuroscience (SCCN) at the  
168 University of California San Diego (UCSD).

169 LSL can be embedded in free and open-source stimulus presentation platforms like **PsychoPy**  
170 (<https://www.psychopy.org/>) and **Unity** (<https://unity.com/>, Figure 1).

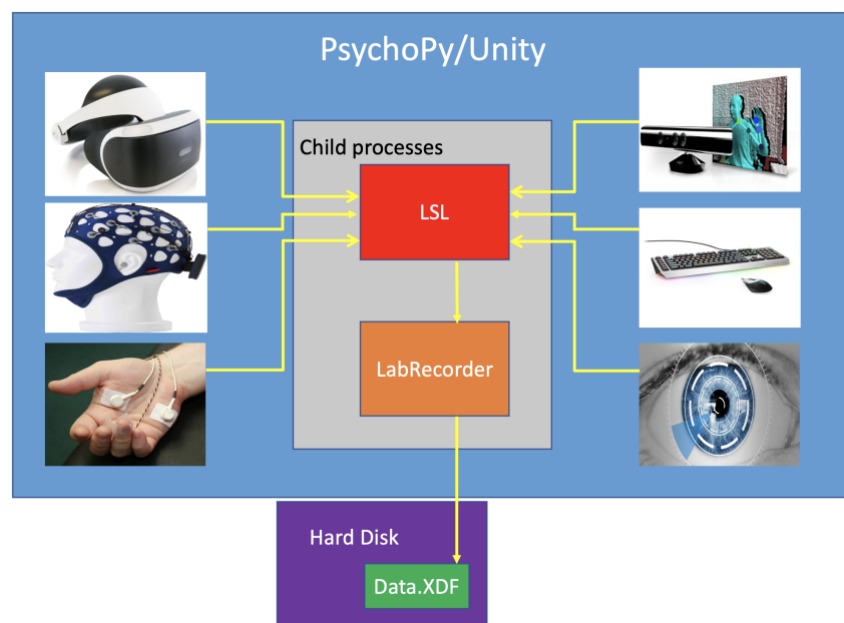

171

172 **Figure 1.** Schematic architecture for integrating devices: Objects that are defined in **PsychoPy/Unity**  
173 (usually task markers) can send data directly to LSL. Also, different devices can send data to LSL by  
174 calling child processes inside **PsychoPy/Unity**

175 Wang et al. (2014) used **PsychoPy**, EEG, and LSL for Brain-Computer Interface (BCI) stimulus  
176 presentations. They used these to synchronize the stimulus markers and EEG measurements [21].

177 Figure 2, shows the overall structure of the method proposed in this paper.

178

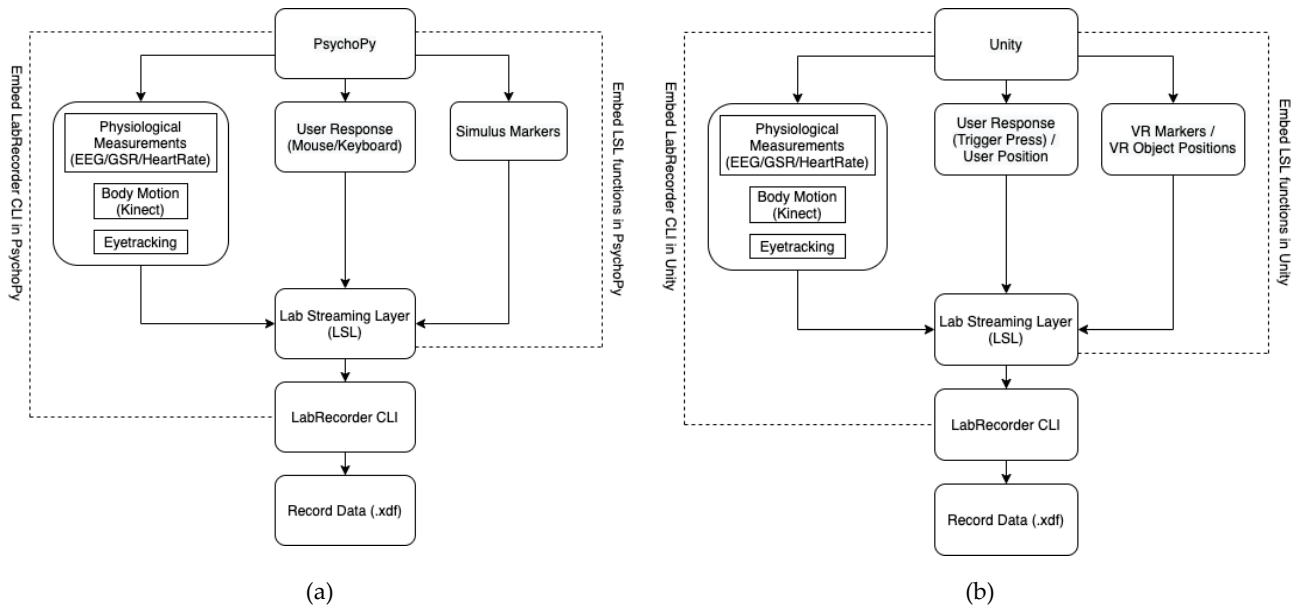

**Figure 2.** Flowchart of creating an automatic multisensory experiment using (a) **PsychoPy**; (b) **Unity**

179 As shown in Figure 2, creating a multimodal/multisensory experiment can be done in  
 180 **PsychoPy/Unity** environment. Different devices send data to **LSL** using **LSL** functions that are  
 181 embedded in **PsychoPy/Unity**. Then by embedding **LabRecorder** in **PsychoPy/Unity**, data can be  
 182 recorded on the disk as a *.xdf* file.

183 The devices used for this paper can be called and start recording by running child processes in  
 184 Python and C#, which allows the processes to be directly embedded in **PsychoPy** and **Unity**,  
 185 respectively. Finally, everything can be started from a main **PsychoPy** experiment or **Unity** VR  
 186 project.

187 In the following, an introduction to **PsychoPy/Unity**, **LSL**, and **LabRecorder**  
 188 (<https://github.com/labstreaminglayer/App-LabRecorder/releases>) is provided.

### 189 3. Overview: **PsychoPy**, **Unity**, **Lab Streaming Layer (LSL)**, **Lab Recorder**

190 Our overall strategy for building a multimodal and multisensory experiment is to bridge  
 191 **PsychoPy/Unity**, **LSL**, and **LabRecorder**. The principle of integration is to call different devices from  
 192 **PsychoPy/Unity** to send their data streams to **LSL**; **LabRecorder** starts recording the streams  
 193 available on **LSL** from **command line**, which would also be embedded in **PsychoPy/Unity**.

194 **PsychoPy** allows for the building of behavioral experiments with little to no programming  
 195 experience using premade templates for stimulus presentation and response collection. **Unity** enables  
 196 the creation of 2D and 3D gaming environments. **LSL** is a set of libraries for synchronous collection  
 197 of multiple time series in research experiments  
 198 (<https://labstreaminglayer.readthedocs.io/info/intro.html>). **LabRecorder** is an **LSL** application that  
 199 allows saving all the streams that are available on **LSL** on disk in a single *.xdf* file.

#### 200 *PsychoPy*

201 **PsychoPy** is an open-source software package written in the Python programming  
 202 language primarily for use in Neuroscience and Experimental Psychology research [22,23]  
 203 (<https://www.psychopy.org/>). **PsychoPy** has three main building blocks for constructing behavioral  
 204 experiments: stimulus/response components, routines and loops (Figure 3).

205 Stimulus components are premade templates for displaying various types of stimuli: geometric  
 206 shapes, pictures, videos, audio signals, etc. The user can control which stimuli they want to present,  
 207 in what order and for how long (along with other stimulus-specific properties). Similarly, response

208 components allow for recording different types of responses: key press, mouse clicks/moves, as well  
209 as vocal responses.

210 Stimulus and response components are organized within routines, which are a sequence of  
211 events within one experimental trial. For example, consider a Flanker task (Figure 3) in which a  
212 participant is presented with five arrows, with the middle arrow pointing to the same direction as  
213 surrounding arrows (congruent) or to the opposite direction (incongruent). The participant has to  
214 press the key on the keyboard indicating the direction of the middle arrow (“left” or “right” arrow  
215 key). In this task, the stimulus component “arrows” (Figure 3C) presents the arrangement of letters  
216 for a given trial, while component “key\_resp” (Figure 3D) records the participant’s response.  
217 Altogether, they constitute the routine “flanker\_task” (Figure 3A).

218 The trial parameters (in this case, which succession of arrows to show, e.g., →→→→→ or  
219 ←←→←←) are controlled by the loop “trials\_loop” (Figure 3B). Loops contain information about the  
220 variables that are supposed to change from trial to trial. As the name suggests, loops repeat routines  
221 updating the routine components with the values prescribed by the experimenter.

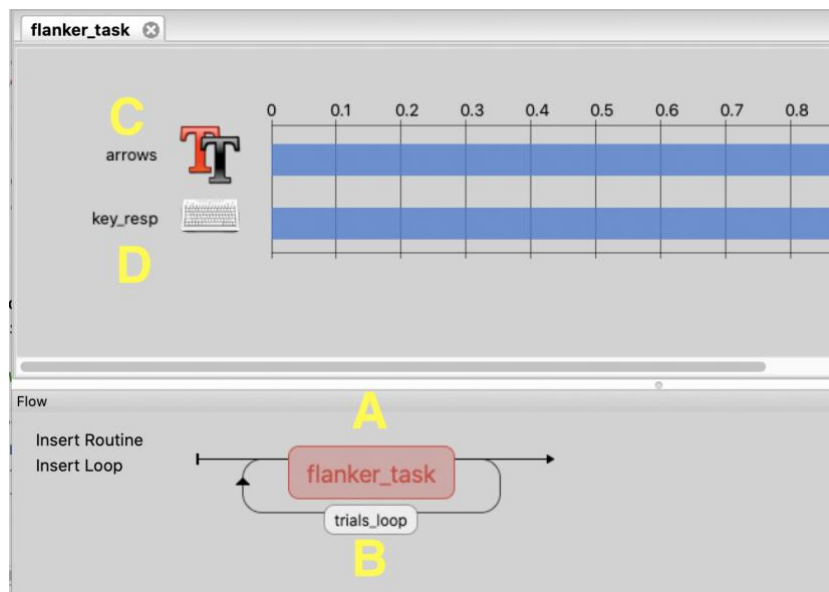

222

223 **Figure 3. PsychoPy components: A) routine B) loop C) text stimulus D) keyboard response**

224 **PsychoPy** provides an option to include custom python code, which can be embedded in the  
225 beginning or the end of the experiment, in the beginning or the end of each routine, and for each  
226 frame of the screen; the code written in Each Frame will run every refreshment cycle of the monitor  
227 screen (Figure 4).

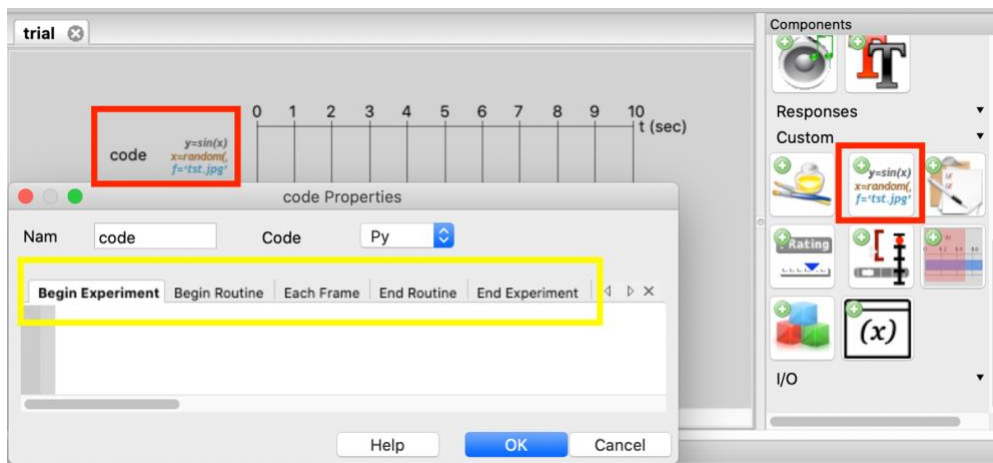

228

229 **Figure 4. PsychoPy python custom code component**

## 230 Unity

231 Unity is a game engine platform that allows creating games in 2D and 3D environments. It  
232 enables the users to script in C# for handling the scenes and objects. In Unity, the game environment  
233 is called a **Scene**, and each component in the environment (e.g., characters) is called a **GameObject**.  
234 Every **GameObject** will be defined in a **Scene**. Complete documentation of **Unity** is available on  
235 <https://docs.unity3d.com/Manual/UsingTheEditor.html> (Figure 5).

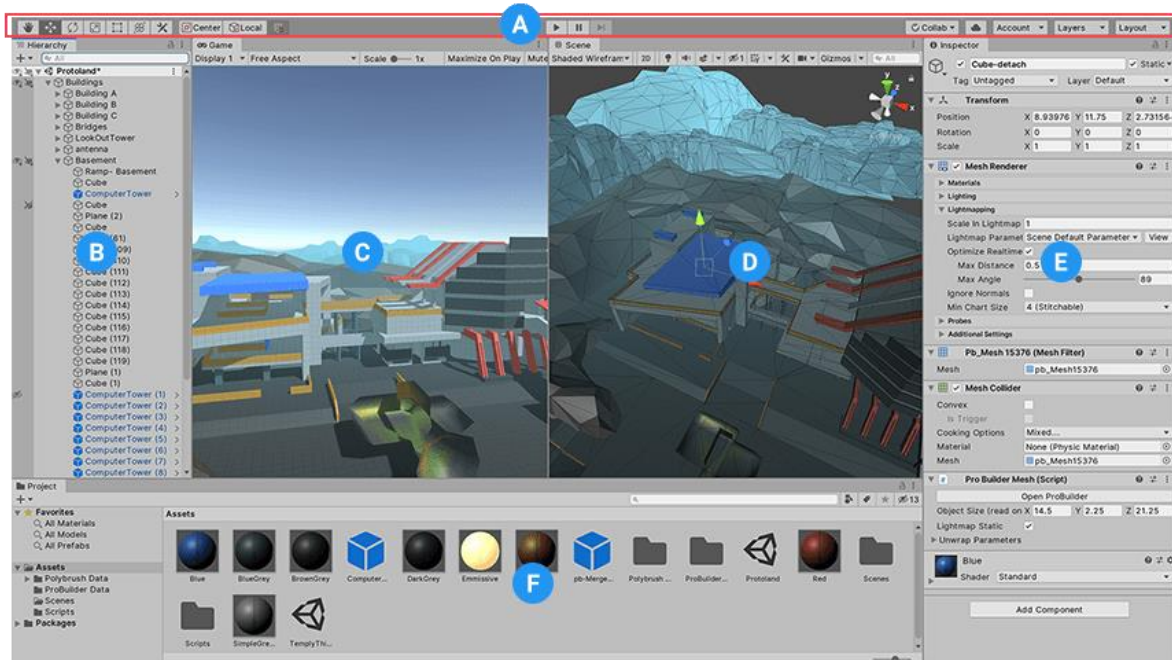

236

237 **Figure 5.** (A) Left: tools for manipulating the Scene view and the GameObjects within Scene; Centre:  
238 play, pause and step buttons. (B) Hierarchy of every GameObject in the Scene shows how  
239 GameObjects attach together. (C) The Game view shows the final rendered game. The play button  
240 can start the game simulation. (D) The Scene view allows to visually navigate and edit your Scene.  
241 (E) The Inspector Window allows to view and edit all the properties of the currently selected  
242 GameObject. (F) The Project window shows the imported Assets of the game.

243 We created a multisensory experiment by embedding **LSL** in the **PsychoPy** custom code  
244 component and **Unity**. This process is discussed in detail in sections 4.4 and 5 for **PsychoPy** and  
245 **Unity**, respectively.

## 246 Lab Streaming Layer

247 The Lab Streaming Layer (**LSL**) connects a **PsychoPy** experiment or a game in **Unity** (stimulus  
248 presentation and data acquisition) with multiple sensor devices. **LSL** consists of a core library and  
249 applications built on top of that library, which allows synchronous collection of multiple time series  
250 in research experiments and recording the collected data on disk. In **LSL**, a single measurement from  
251 a device (from all channels) is called a **Sample**. Samples can be sent individually for improved latency  
252 or in chunks of multiple samples for improved throughput. All the information about data streams  
253 (series of sampled data) is sent through an XML as the metadata which contains **name**, **type**,  
254 **channel\_count**, **channel\_format** and **source\_id** for each stream. Through Stream Outlet, chunks or  
255 samples of data are made available on **LSL** network and these streams are visible to all the computers  
256 connected to the same local network, LAN (Local Area Network) or WLAN (Wireless Local Area  
257 Network). Streams can be distinguished with their assigned name, type and other queries created on  
258 the XML metadata. The streams that are available on the **LSL** network can be received by the  
259 computers that call the Stream Inlet.

260 To define a stream in **LSL**, stream outlets are created by calling `StreamOutlet` functions that take  
261 `StreamInfo` as the input. `StreamInfo` includes name, type, number of channels, channel format (string,  
262 int, float, etc.) and source ID as the input. Name, type and source ID are arbitrary and can be defined  
263 by the user; the number of channels and channels format depends on the characteristics of the  
264 streams. Then whenever needed, data can be transported by calling the functions that push the data  
265 in `Samples` or `Chunks` to the **LSL**. Once all the stream outlets are available on the **LSL** network, they  
266 can be saved in a single XDF using **LabRecorder** application, or they can be received in another  
267 platform by means of `StreamInlet` functions.

268 This complicated data acquisition and synchronization process can be semi-automated by  
269 **LabRecorder**, which is explained in the next section.

## 270 *LabRecorder*

271 **LabRecorder** is responsible for recording the streams available on **LSL** on the hard disk (it can  
272 be downloaded from <https://github.com/labstreaminglayer/App-LabRecorder/releases>). Figure 6  
273 shows **LabRecorder** GUI; names of the streams that are available on **LSL** can be seen on the left panel.  
274 However, in the latest version of **LabRecorder**, there is no need for **LabRecorder** GUI to record the  
275 data. **LabRecorder** can start recording the available **LSL** streams by writing one line of code that  
276 opens the **LabRecorder** command line interface (**LabRecorderCLI**) in the background. This process  
277 is explained in Sections 4 and 5.

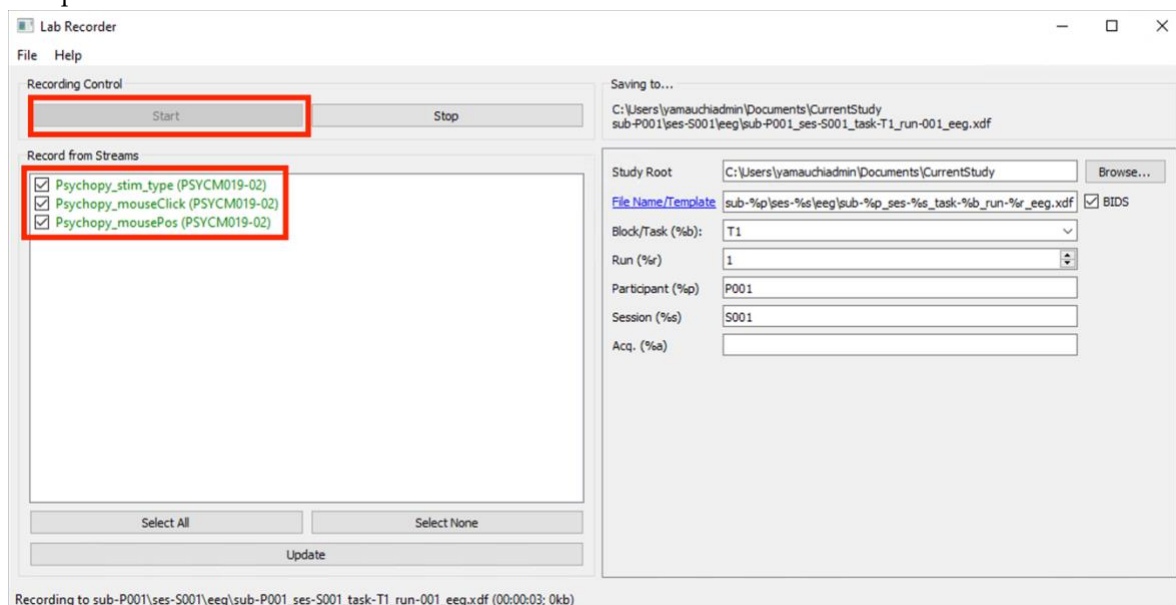

278

279

Figure 6. LabRecorder GUI

280 In sections 4 and 5, a case study explains how to integrate multiple devices such as EEG, GSR,  
281 Eyetracking, Bodymotion, mouse trajectories, button click, and task-related markers within a  
282 stimulus presentation software, **PsychoPy** (section 4) and **Unity** (section 5). The program  
283 automatically saves all the recording data into a single `.xdf` file in a user-specified folder. All these  
284 would be done with the aid of the **LSL** embedded in **PsychoPy/Unity**.

285 We used open-source software for the integration of different sensors and devices. Also, different  
286 consumer-grade and affordable devices are used, including 1) for EEG, g.tec Unicorn, Muse,  
287 Neurosky Mindwave [24], BrainProducts LiveAmp, OpenBCI Cyton (8-Channel) and OpenBCI  
288 Cyton + Daisy (16-Channel), 2) for GSR, Gazepoint biometrics device and also e-Health Sensor  
289 Platform v2.0 for **Arduino**, 3) for eyetracking Gazepoint, 4) for body motion, Microsoft Kinect Sensor  
290 V2 for Windows. A basic sample experiment in **PsychoPy** and a basic **VR** environment in **Unity** that  
291 integrate different devices are available on our GitHub: [PsychoPy Example GitHub](#) and  
292 [VR Example GitHub](#). Table 1 shows the list of the devices used for the case study.



**Table 1.** The devices used for integration in the sample experiment.

| Type                     | Device                             | Method for sending data to LSL                                                  | Link                                                                                                                                                          |
|--------------------------|------------------------------------|---------------------------------------------------------------------------------|---------------------------------------------------------------------------------------------------------------------------------------------------------------|
| Mouse clicks/coordinates | Mouse                              | define LSL stream in PsychoPy                                                   | -----                                                                                                                                                         |
| EEG                      | g.tec Unicorn                      | C++ application called from PsychoPy/Unity                                      | <a href="https://github.com/moeinrazavi/Unicorn_LSL">https://github.com/moeinrazavi/Unicorn_LSL</a>                                                           |
|                          | BrainProducts LiveAmp              | C++ application called from PsychoPy/Unity                                      | <a href="https://github.com/moeinrazavi/LiveAmp-LSL">https://github.com/moeinrazavi/LiveAmp-LSL</a>                                                           |
|                          | OpenBCI Cyton (+Daisy)             | Python script called from PsychoPy/Unity                                        | <a href="https://github.com/moeinrazavi/OpenBCI-LSL">https://github.com/moeinrazavi/OpenBCI-LSL</a>                                                           |
|                          | NeuroSky Mindwave                  | NeuroSky Python library and functions in Psychopy/Call a Python script in Unity | -----                                                                                                                                                         |
|                          | Muse                               | Muse Python library and functions in Psychopy/Call a Python Script in Unity     | Link 1: <a href="#">BlueMuse Application</a><br>Link 2: <a href="#">BlueMuse Installation Guide</a>                                                           |
| GSR                      | eHealth Sensor v2.0 Arduino Shield | Python script called from PsychoPy/Unity                                        | <a href="https://github.com/moeinrazavi/eHealth-GSR-LSL">https://github.com/moeinrazavi/eHealth-GSR-LSL</a>                                                   |
|                          | Gazepoint Biometrics Device        | Python script called from PsychoPy/Unity                                        | <a href="https://github.com/moeinrazavi/Gazepoint-Eyetracking-GSR-HeartRate--LSL">https://github.com/moeinrazavi/Gazepoint-Eyetracking-GSR-HeartRate--LSL</a> |
| Eyetracking              | Gazepoint                          | Python script called from PsychoPy/Unity                                        | <a href="https://github.com/moeinrazavi/Gazepoint-Eyetracking-GSR-HeartRate--LSL">https://github.com/moeinrazavi/Gazepoint-Eyetracking-GSR-HeartRate--LSL</a> |
| Body Motion              | Kinect                             | C++ application called from PsychoPy/Unity                                      | <a href="https://github.com/moeinrazavi/Kinect-BodyBasics-LSL">https://github.com/moeinrazavi/Kinect-BodyBasics-LSL</a>                                       |

294 Next two sections provide a step-by-step case study detailing the integration of multiple sensory  
295 devices using **PsychoPy/Unity**, **LSL** and **LabRecorder**. Also, it is explained how to make the process  
296 automatic for an easy-to-use multimodal-multisensory experiment.

#### 297 4. Case Study: Building a Multisensory Experiment (PsychoPy)

298 This section provides a tutorial for building a multisensory experiment by embedding **LSL** in  
299 **PsychoPy**. The task used in this case study is a simple version of the Flanker task with only 4 trials.  
300 On each screen, participants are presented with a sequence of arrows  $\rightarrow\rightarrow\rightarrow\rightarrow\rightarrow$ ,  $\leftarrow\leftarrow\leftarrow\leftarrow\leftarrow$ ,  
301  $\rightarrow\rightarrow\leftarrow\rightarrow\rightarrow$  or  $\leftarrow\leftarrow\rightarrow\leftarrow\leftarrow$  (Figure 7) and are asked to navigate their mouse cursor to a box on the top  
302 left or top right of the screen based on the direction of the center arrow in each sequence. Starting  
303 with this simple task, we show step by step how to add mouse/cursor motion, EEG (g.tec Unicorn,  
304 Muse, Neurosky Mindwave, BrainProducts LiveAmp, OpenBCI Cyton and OpenBCI Cyton + Daisy),  
305 GSR (e-Health Sensor Platform v2.0 for Arduino and also Gazeport biometrics device), Eyetracking  
306 (Gazeport), and Body Motion (Kinect) one by one to the experiment.

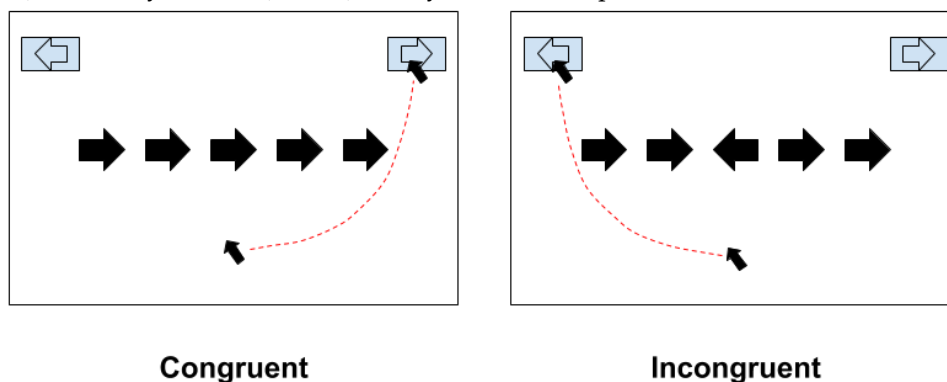

308 **Figure 7.** Arrow Flanker task

#### 309 4. 1. Software and Plugin Installation

310 **PsychoPy** provides a graphical user interface for designing a wide range of psychological  
311 experiments without any programming (see Appendix for the installation process). For example,  
312 text/picture can be added in different routines as stimuli by adding text/picture items, and also  
313 keyboard/mouse can be added as items for recording response. **PsychoPy** uses Python programming  
314 language in the background; custom Python code items can be used to add the features which are  
315 not available in the **PsychoPy** GUI (e.g., **LSL**). Routines and loops can be added for repeating one or  
316 several routines, including the stimuli, user's response, and sending their markers to **LSL** in the  
317 experiment. Then all of these (routines, loops and custom code in routines) can be compiled and run  
318 together using **PsychoPy**. **pysl** is a Python library that allows using **LSL** in Python (see Appendix  
319 for installing **pysl** on **PsychoPy**). Module **Popen** from python **subprocess** library is used for sending  
320 data from different devices to **LSL**. Then, using module **popen** from python **os** library enables us to  
321 use **command line** to open **LabRecorder** in the background of the experiment. This will save all the  
322 streams automatically without needing to open the **LabRecorder** user interface (explained in section  
323 4.3).

#### 324 4. 2. Design

325 As shown in Figure 8, the example experiment contains 6 routines and one loop for the last 3  
326 routines, which repeats the stimulus presentation. There are 3 main routines named **Initialize**,  
327 **Record\_Start** and **Stimulus\_Presentation**. The **Initialize** routine defines all the streams from the task  
328 that are intended to be sent to **LSL**. In the **Record\_Start** routine, we write a command to start  
329 recording all the streams that are available on **LSL** in a *.xdf* file. Finally, in the **Stimulus\_Presentation**  
330 routine, we write the script to send the task stimulus markers and mouse coordinates to **LSL**.

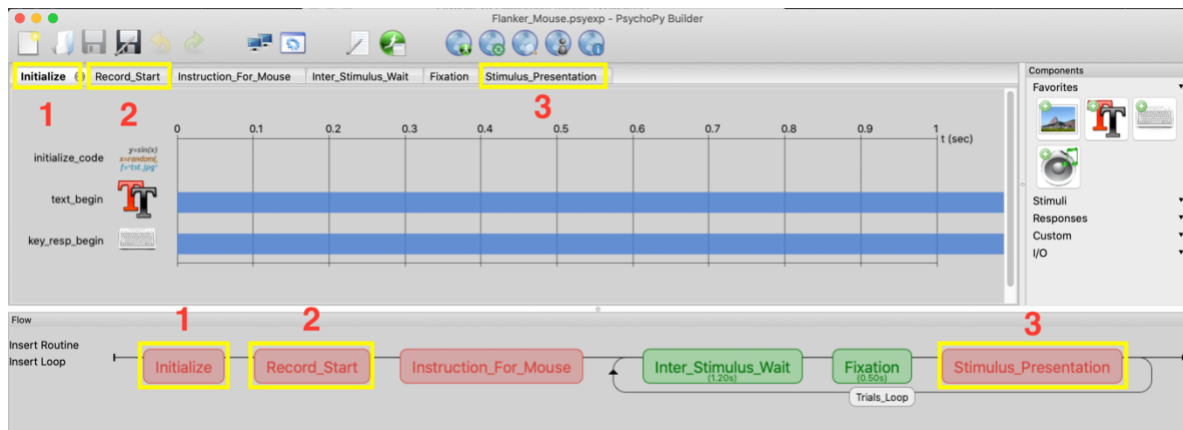

331

332

333

334

**Figure 8.** Main components of the example multisensory experiment: 1) initializing LSL streams 2) start recording LSL streams 3) stimulus presentation and sending stimulus and response markers to LSL

335

336

In the **Experiment Settings**, as shown in Figure 9, one of the fields is defined as **UIN**, which would be used in the recorded *.xdf* file name.

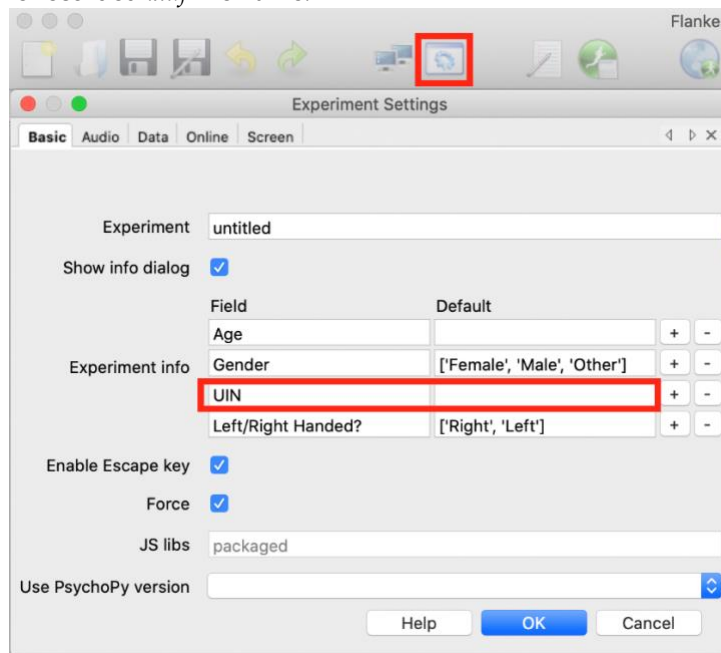

337

338

**Figure 9.** PsychoPy Experiment Settings

339

340

341

342

In the experiment folder, there is a folder, *Stimuli*, and a file, *stimuliFile.xlsx*, inside it, which contains **stimID**, **stim\_type**, **stim**, **corr\_key** (shows the correct response) and **cong** (indicates whether the stimulus is congruent or incongruent) (Figure 10). This *.xlsx* file is the input for the Conditions of the loop component **Trials\_Loop** (Figure 11).

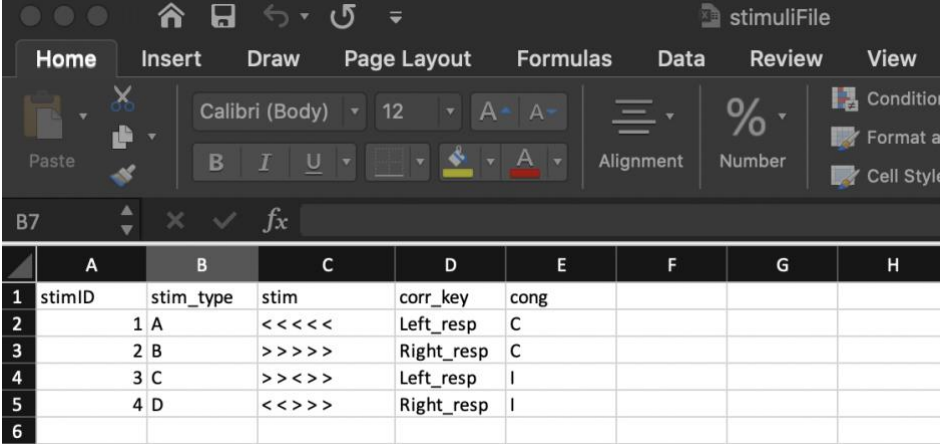

|   | A      | B         | C      | D          | E    | F | G | H |
|---|--------|-----------|--------|------------|------|---|---|---|
| 1 | stimID | stim_type | stim   | corr_key   | cong |   |   |   |
| 2 |        | 1 A       | <<<<<  | Left_resp  | C    |   |   |   |
| 3 |        | 2 B       | >>>>>  | Right_resp | C    |   |   |   |
| 4 |        | 3 C       | >><<>> | Left_resp  | I    |   |   |   |
| 5 |        | 4 D       | <<<>>> | Right_resp | I    |   |   |   |
| 6 |        |           |        |            |      |   |   |   |

343

344

Figure 10. the Excel file used for stimulus presentation in our PsychoPy example experiment

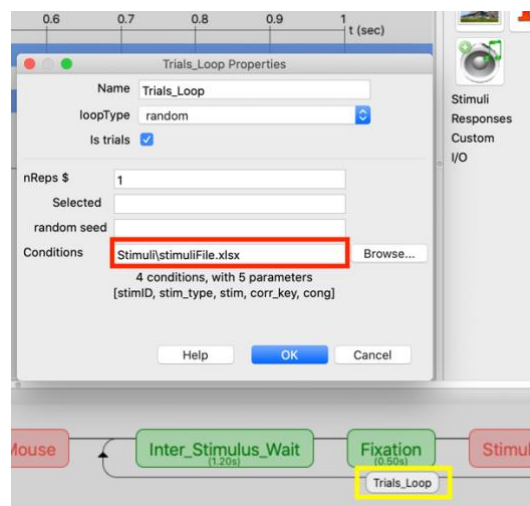

345

346

Figure 11. Choosing *stimuliFile.xlsx* as the input for the Conditions of the loop

#### 347 4. 3. Adding Automatic Data Acquisition to the Experiment

348 To start recording the data streams available on LSL into a *.xdf* file, the code script shown in  
349 Figure 12 is added in the custom code named *xdf\_record*, which is inside the **End Routine** tab of the  
350 **Recording\_Start** routine. This script uses Windows **command line** to open the **LabRecorder** in the  
351 background of the experiment and starts recording the data. It is important to note that all the streams  
352 are created and initialized before the script that calls **LabRecorder** in the background.

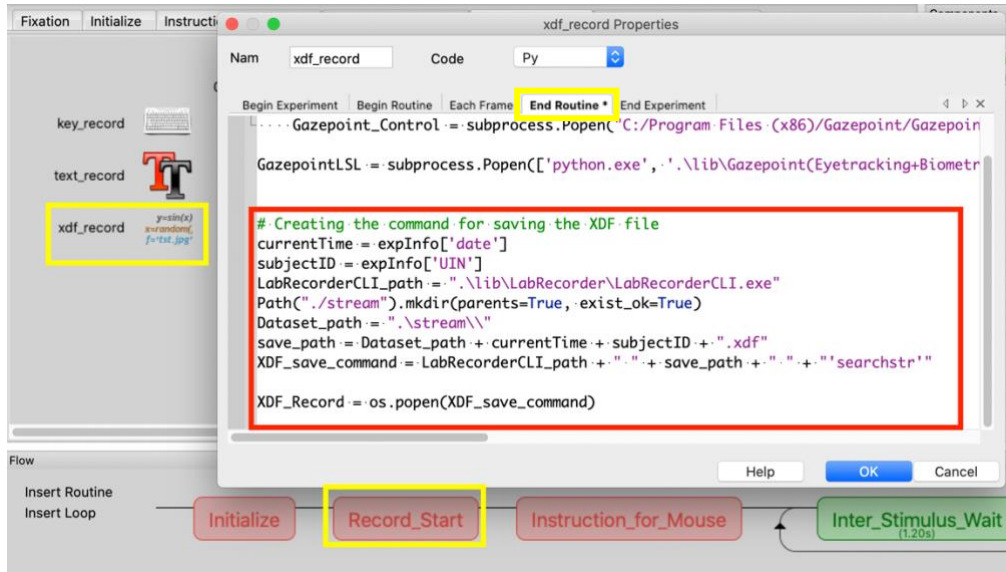

353

354

Figure 12. PsychoPy custom code from starting LabRecorder automatically from command line

355

In the following, a step by step process on how to add different streams to the experiment is shown.

356

357

#### 4.3.1 Mouse data + Flanker task markers

358

After opening the experiment *Flanker\_Mouse.psyexp*, inside the **Initialize** routine, there is a custom code named **initialize\_code**. After opening **initialize\_code**, in the **Begin Experiment** tab, first, the required modules are imported (Figure 13), then 3 LSL streams are created. The first stream is for sending stimulus markers (Figure 14), the second stream is for sending user response markers (Figure 15), and the third stream is for sending mouse coordinates to LSL (Figure 16).

359

360

361

362

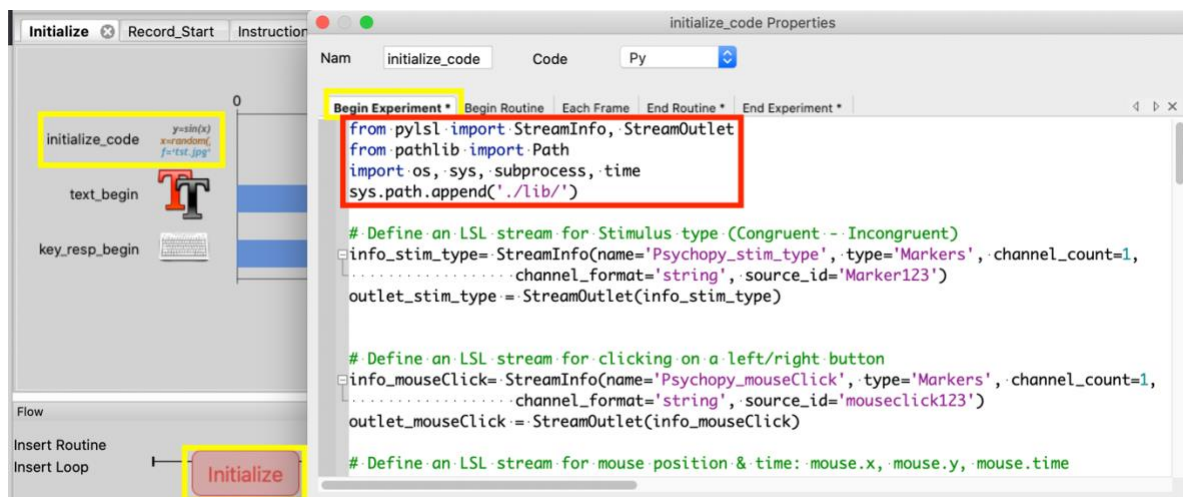

363

364

Figure 13. Importing the required modules

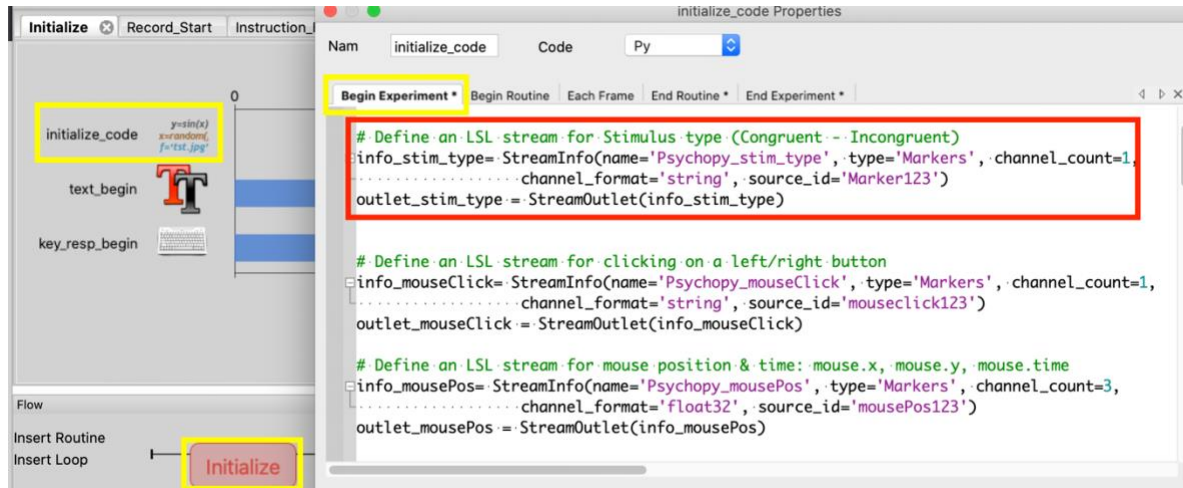

365

366  
367

Figure 14. Defining a stream for sending stimulus type (congruent/incongruent) to LSL in each stimulus presentation

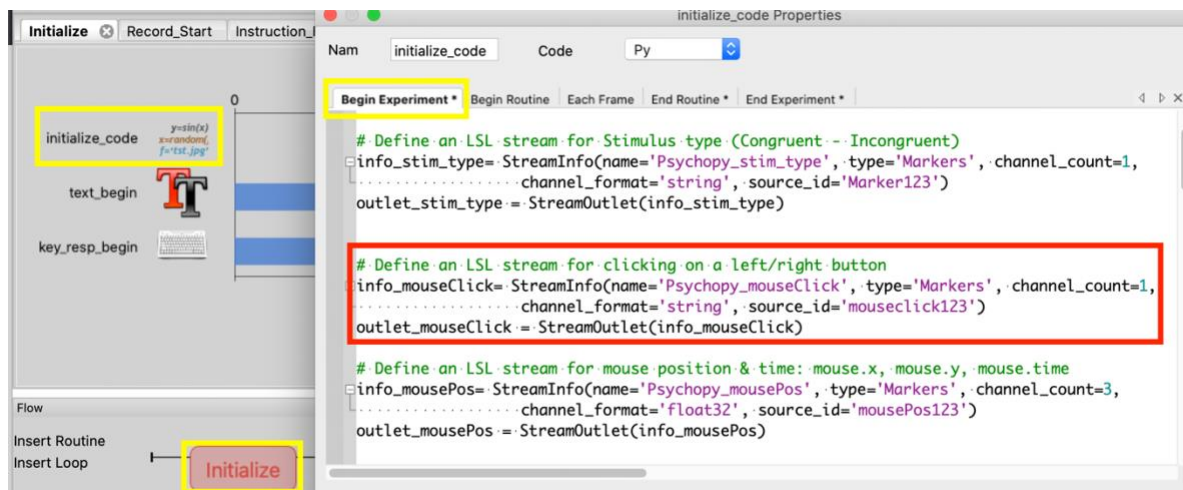

368

369

Figure 15. Defining a stream for sending user response (clicking on the left/right box) to LSL

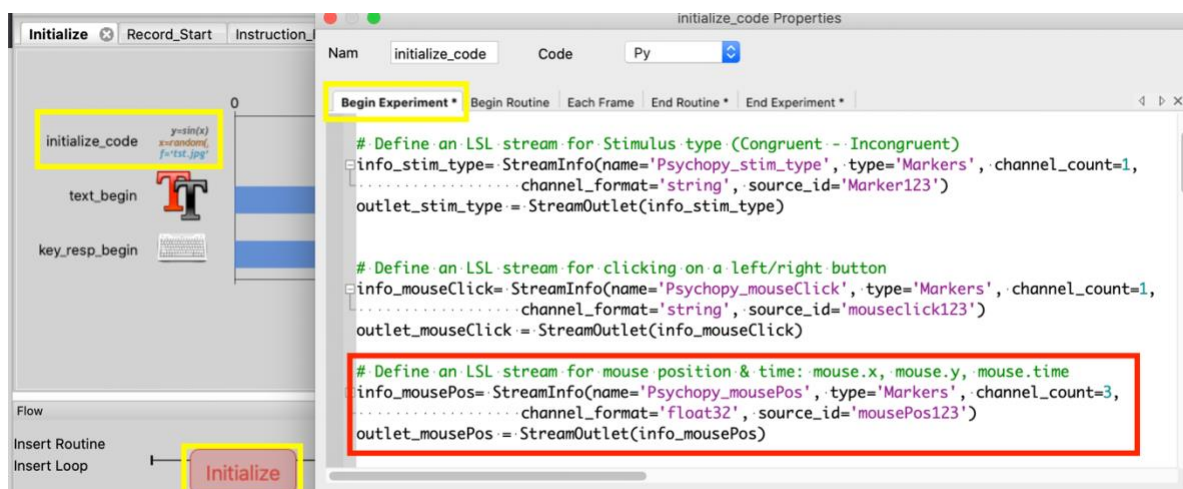

370

371

Figure 16. Defining a stream for sending mouse coordinates to LSL in each trial

372 In order to send a stimulus marker to LSL, in the **Begin Routine** tab of the custom code  
373 **stimulus\_code**, which is inside the **Stimulus\_Presentation** routine, we added the code shown in  
374 Figure 17. In order to send the user response data to LSL, in the same custom code, we added the  
375 code shown in Figure 18 in the **End Routine** tab (since the option “End Routine on valid click” is  
376 selected for the **mouse** component in the **Stimulus\_Presentation** routine). Finally, to send mouse  
377 coordinates data to LSL, in the **Each Frame** tab (since the mouse coordinates should be sent in each  
378 refresh of the monitor screen), we added the code shown in Figure 19. Similarly, if keyboard is used  
379 instead of mouse for user response, to send keyboard data to LSL, **key\_resp.keys** should be used as  
380 the argument for the `outlet.push_chunk/outlet.push_sample` (This is not shown here for brevity).

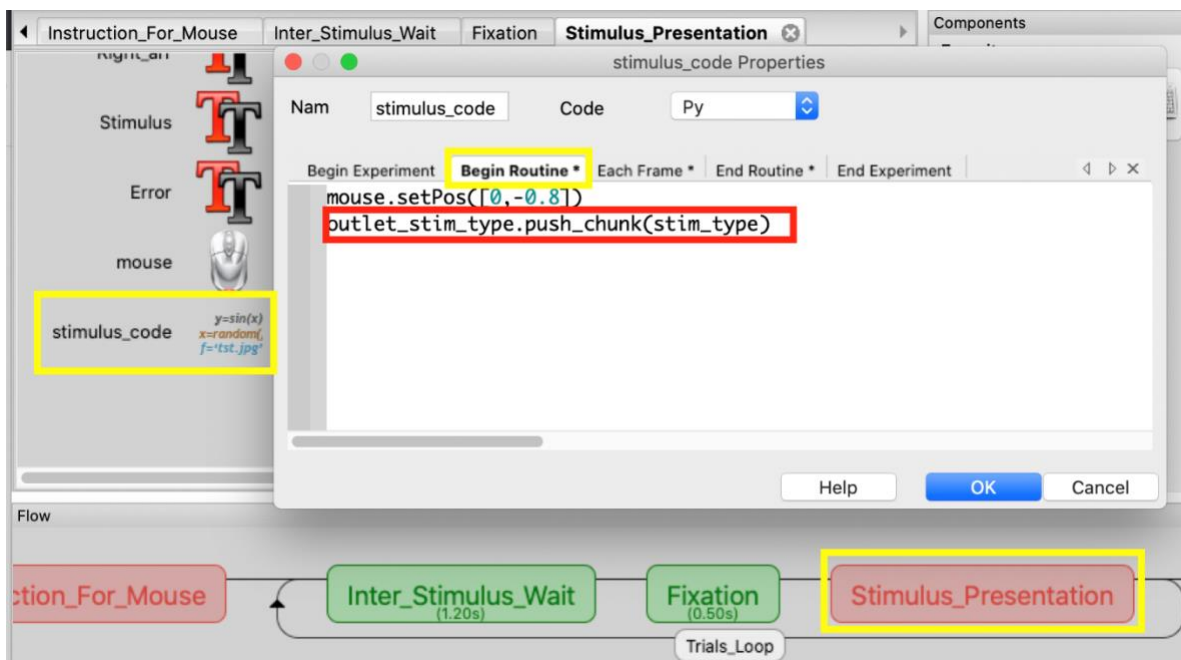

381

382 **Figure 17.** Sending the type of stimulus to LSL at the onset of stimulus presentation on the screen

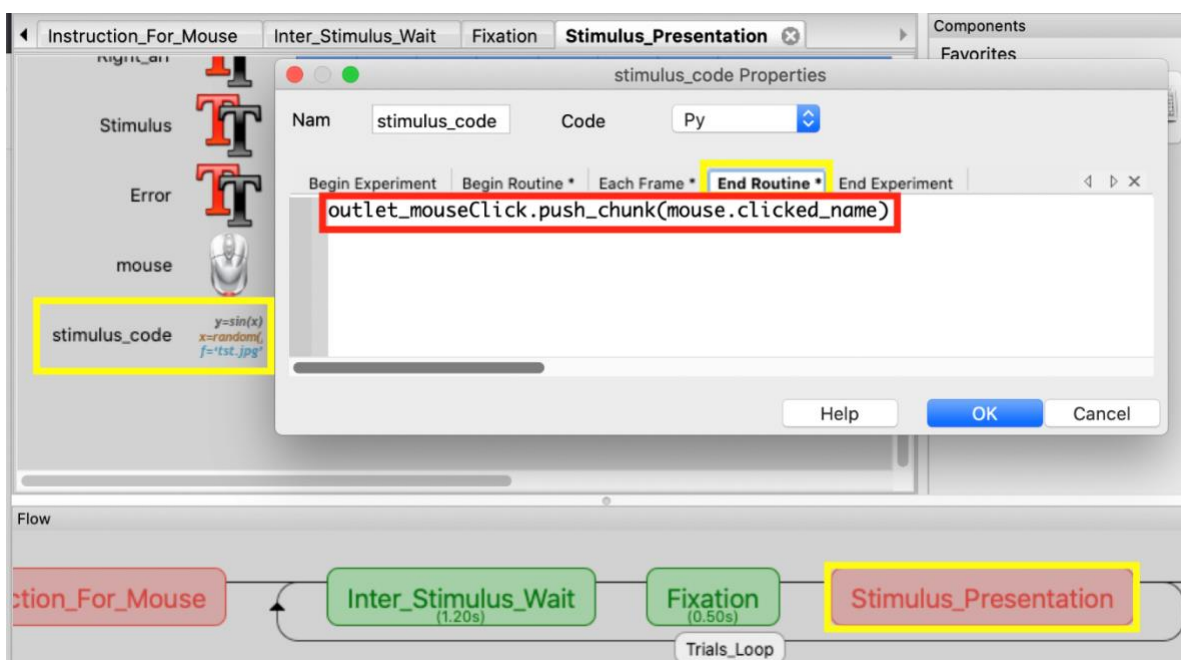

383

384 **Figure 18.** Sending the user response data (whether the user clicked on the left/right box) to LSL  
385 at the moment he clicks on the left/right box.

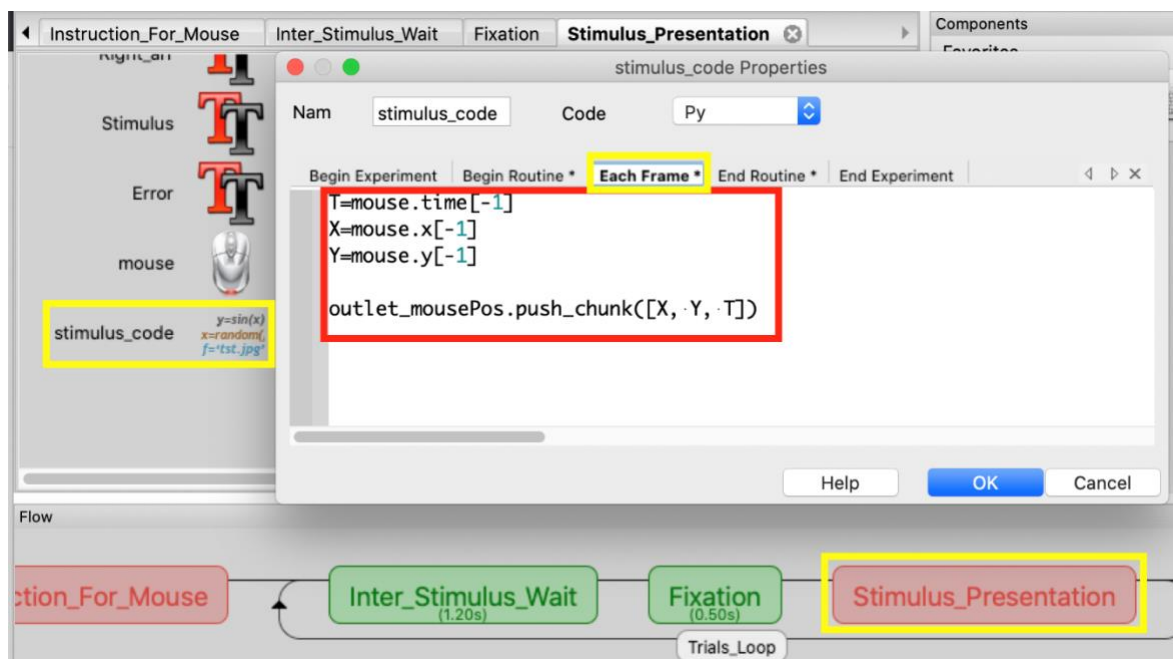

386

387

**Figure 19.** Sending mouse coordinates in each refresh of the monitor screen to LSL

388

Features such as maximum velocity, maximum acceleration, total distance of the mouse movement, area under the curve, maximum absolute deviation from a straight line, etc. can be extracted easily from Mouse data by a package for R and Python called *mousetrap* (Kieslich 2017).

389

390

#### 4.3.2 Mouse Data + Flanker task markers + EEG

391

The following shows how to add different EEG devices to the experiment.

392

- **g.tec Unicorn (8-channel EEG device)**

393

We have developed a C++ program (using Unicorn SDK) to send the data from Unicorn device to LSL. The application can be downloaded from our GitHub and copied inside the experiment *lib* folder. Then the application can be simply called from **PsychoPy** by adding the script shown in Figure 20 in the **Begin Experiment** tab of the **initialize\_code** inside the **Initialize** routine. This will automatically send data from a paired Unicorn device to LSL.

394

395

396

397

398

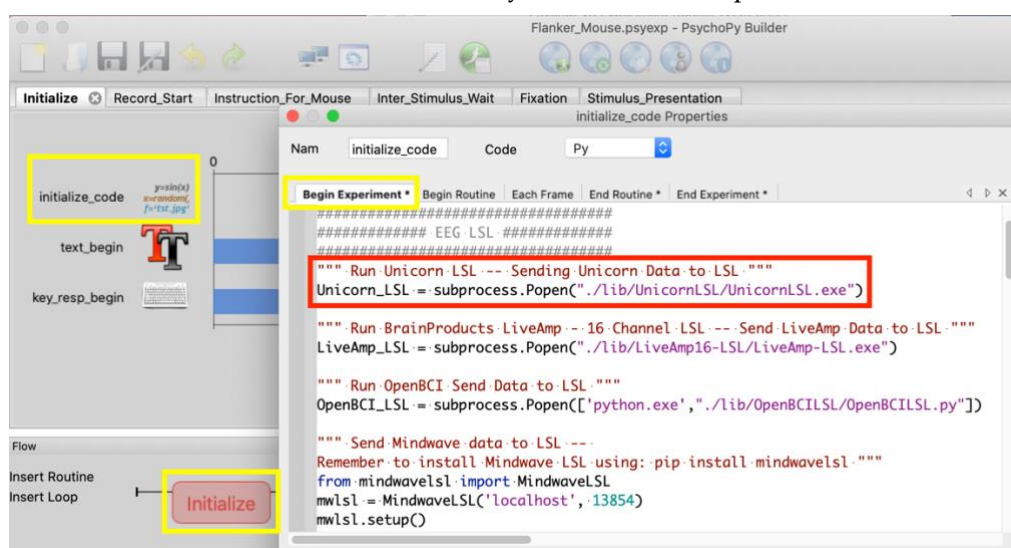

399

400

**Figure 20.** Running the application for sending g.tec Unicorn data to LSL

401



402 • **BrainProducts LiveAmp (16, 32 and 64-channel EEG device)**

403 We have developed three C++ applications (using LiveAmp SDK) to send data from 16, 32  
404 and 64-channel LiveAmp devices to LSL. The application associated with the desired device  
405 can be downloaded from our GitHub and copied inside the experiment *lib* folder. Then, the  
406 application can be called from **PsychoPy** by adding the script shown in Figure 21 in the  
407 **Begin Experiment** tab of the **initialize\_code** which is inside the **Initialize** routine. This will  
408 automatically send data from a LiveAmp device to LSL.

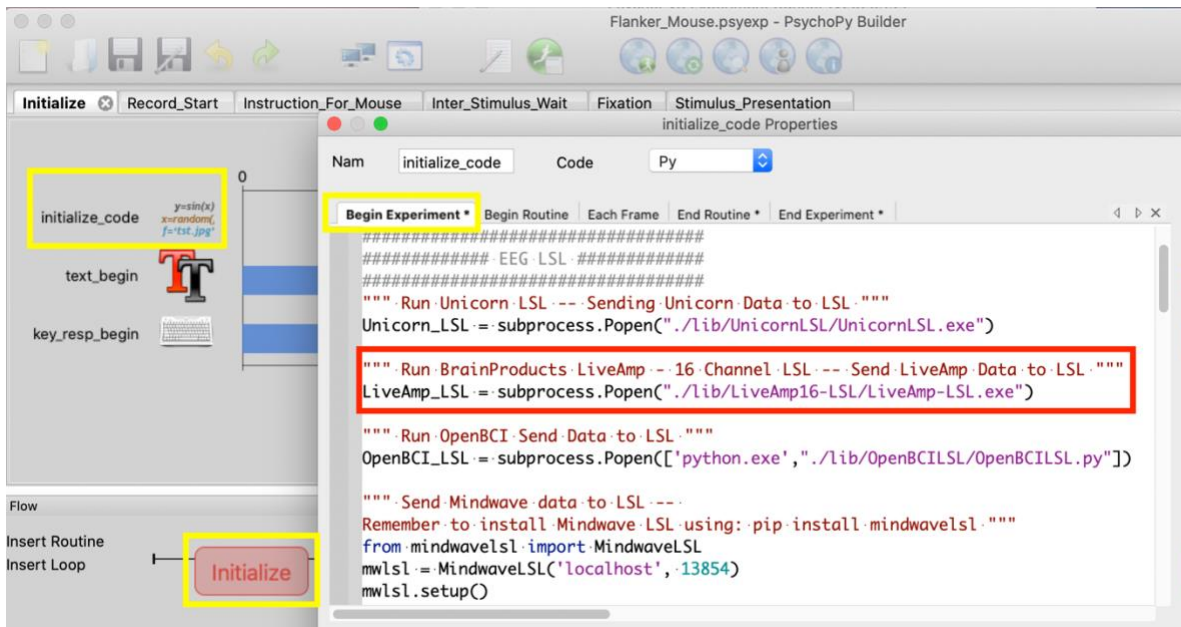

409

410 **Figure 21.** Running the application for sending BrainProducts LiveAmp data to LSL

411 • **OpenBCI Cyton (8-channel) and OpenBCI Cyton + Daisy (16-channel EEG Device)**

412 First pyOpenBCI needs to be installed using: **pip install pyOpenBCI**. Then *OpenBCILSL*  
413 folder should be download from our GitHub and copied in the experiment *lib* folder. Then,  
414 to send data from OpenBCI automatically to LSL, the code shown in Figure 22 should be  
415 added in **Begin Experiment** tab of the **initialize\_code** inside the **Initialize** routine. In the  
416 *OpenBCILSL.py* file, in case Daisy module (16-channel) is used, **daisy = True** and the number  
417 of channels in the LSL stream info = 16; otherwise, **daisy = False** and the number of channels  
418 in the LSL stream info = 8 (Figure 23).

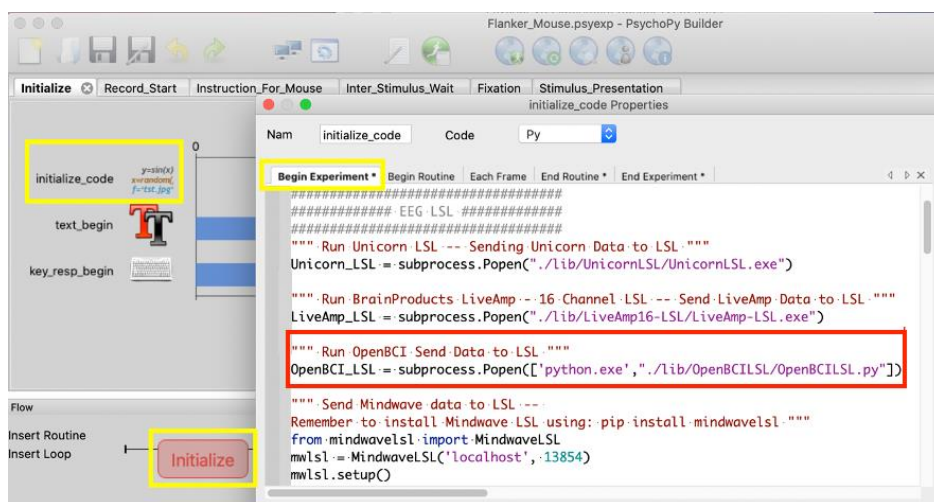

419

420 **Figure 22.** Calling the Python script for sending OpenBCI Cyton/OpenBCI Cyton + Daisy data to  
421 LSL

```
OpenBCILSL.py x
Users > moeinrazavi > Desktop > Flanker_Mouse_Sensors > lib > OpenBCILSL > OpenBCILSL.py > ...
1 # First you need to install pyOpenBCI using: pip install pyOpenBCI
2 from pyOpenBCI import OpenBCICyton
3 from pylsl import StreamInfo, StreamOutlet
4 import numpy as np
5
6 SCALE_FACTOR_EEG = (450000)/24/(2**23-1) #uV/count
7 SCALE_FACTOR_AUX = 0.002 / (2**4)
8
9
10 info_eeg = StreamInfo('OpenBCIEEG', 'EEG', 16, 125, 'float32', 'OpenBCItestEEG')
11
12 print("Creating LSL stream for AUX. \nName: OpenBCIAUX\nID: OpenBCItestEEG\n")
13
14 info_aux = StreamInfo('OpenBCIAUX', 'AUX', 3, 125, 'float32', 'OpenBCItestAUX')
15
16 outlet_eeg = StreamOutlet(info_eeg)
17 outlet_aux = StreamOutlet(info_aux)
18
19 def lsl_streamers(sample):
20     outlet_eeg.push_sample(np.array(sample.channels_data)*SCALE_FACTOR_EEG)
21     outlet_aux.push_sample(np.array(sample.aux_data)*SCALE_FACTOR_AUX)
22
23 board = OpenBCICyton(port='COM3', daisy=True)
24
25 board.start_stream(lsl_streamers)
```

422

423

Figure 23. Python script for sending OpenBCI Cyton/OpenBCI Cyton + Daisy data to LSL

424

- **NeuroSky Mindwave (1-channel EEG device)**

425

First, **mindwavelsl** needs to be installed using the command **pip install mindwavelsl**. Then, the lines of code shown in Figure 24 should be added in the **Begin Experiment** tab of the **initialize\_code**, which is inside the **Initialize** routine.

426

427

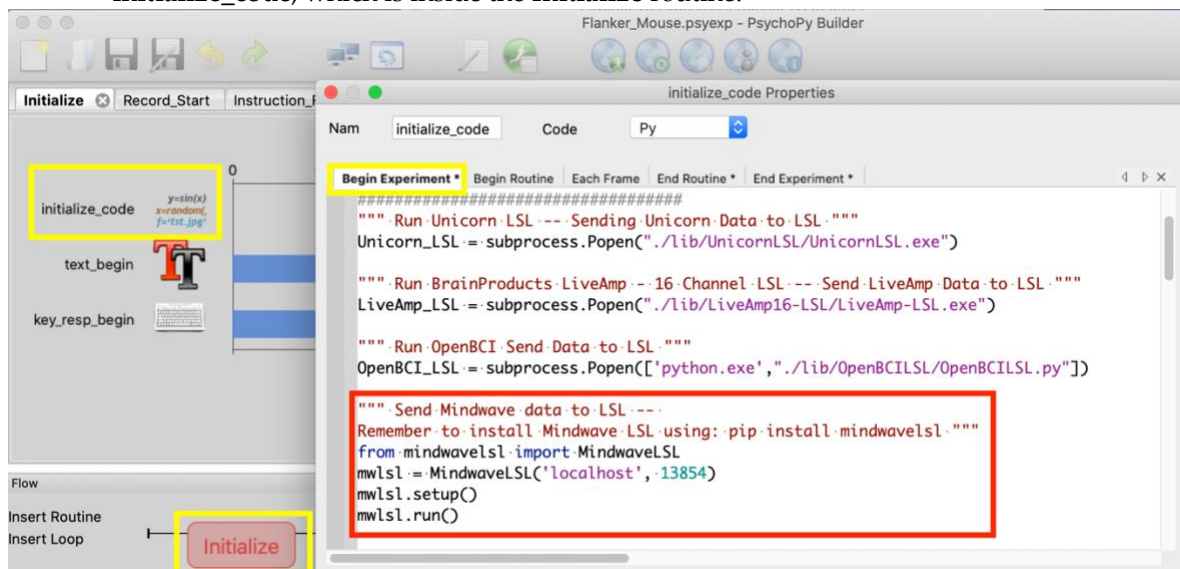

428

429

Figure 24. Sending NeuroSky Mindwave data to LSL

430

- **Muse (4-channel EEG device)**

431

First, **BlueMuse** needs to be downloaded from:

432

[https://github.com/kowalej/BlueMuse/releases/download/v2.1/BlueMuse\\_2.1.0.0.zip](https://github.com/kowalej/BlueMuse/releases/download/v2.1/BlueMuse_2.1.0.0.zip) and

433

installed as instructed in <https://github.com/kowalej/BlueMuse>. Then **muselsl** module

434

should be installed using: **pip install muselsl**. To run **BlueMuse** automatically in the

435

background when the experiment is started, the lines shown in Figure 25 should be added

436

in the **Begin Experiment** tab of the **initialize\_code** inside the **Initialize** routine.

437

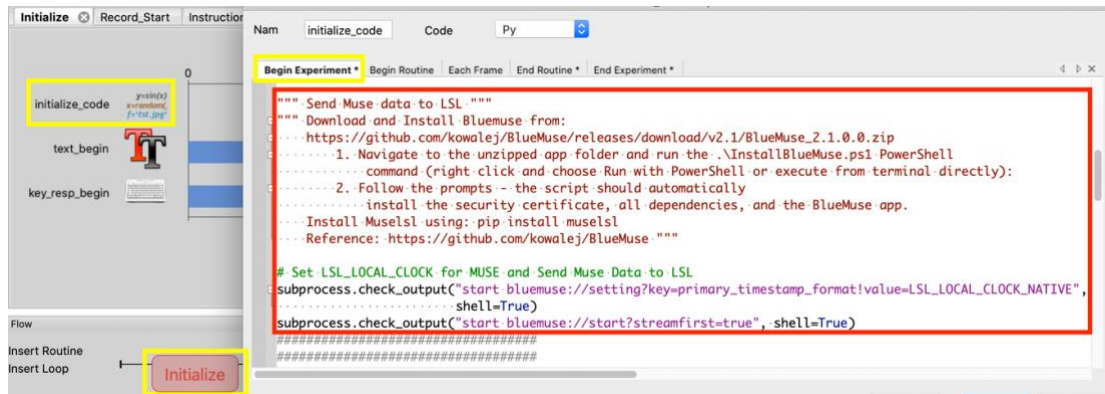

438

439

Figure 25. Sending Muse data to LSL

440 EEG data can be analyzed in EEGLAB (MATLAB Toolbox;  
441 <https://sccn.ucsd.edu/eeglab/index.php>) and Python MNE module. In order to read the .xdf files in  
442 EEGLAB, `xdfimporter` extension needs to be added to EEGLAB. To analyze data using Python MNE,  
443 `pyxdf` module should be installed for Python.

444

#### 4.3.3 Mouse Data + Flanker task markers + EEG + GSR (Arduino)

445

446 For GSR, 2 different devices are used, 1) eHealth Sensor v2.0 Arduino shield, and 2) Gazeport  
447 Biometrics kit. For eHealth Arduino shield, first, add `<eHealthDisplay.h>` and `<eHealth.h>` libraries  
448 need to be added to Arduino IDE. To send data from Arduino to LSL, first its data should be sent to  
449 the Serial port with a script in Arduino IDE (<https://www.arduino.cc/en/main/software>) (Figure 26)  
450 and deploying this script on the Arduino device. Then, a separate Python/C/C++/etc. script can  
451 receive the data from the Serial port and send it to LSL. We have developed a Python script named  
452 `Serial2LSL.py`, which can be downloaded from our GitHub: [https://github.com/moeinrazavi/eHealth-](https://github.com/moeinrazavi/eHealth-GSR-LSL)  
453 `LSL`. In this script the Serial port name needs to be changed based on the name of the port that  
454 the Arduino is connected to (Figure 27). Then, the Python script `Serial2LSL.py` should be called from  
455 `PsychoPy` as a subprocess (Figure 28). This will send the data from Arduino automatically to LSL  
456 when it is connected to the Serial port. The so-called Arduino IDE and Python scripts can be found  
in the `lib` folder.

457

458

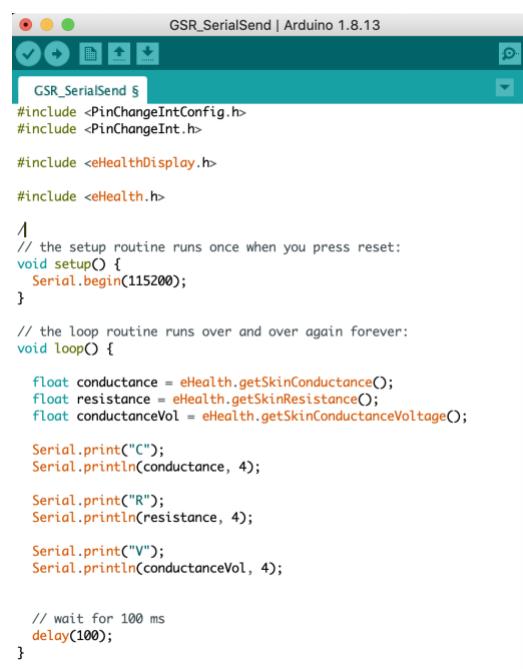

Figure 26. Arduino IDE script to send Arduino data to Serial port

```
Serial2LSL.py ×
Users > moeinrazavi > Desktop > Flanker_Mouse_Sensors > lib > GSR_eHealth > Serial2LSL.py > ...
1  import serial
2  from pylsl import StreamInfo, StreamOutlet
3
4  ser = serial.Serial('COM4', 115200)
5
6  C=""
7  R=""
8  V=""
9
10 info = StreamInfo(name='GSR', type='Voltage', channel_count=1, channel_format='string', source_id='GSR_Voltage')
11
12 outlet = StreamOutlet(info)
13
14 while True:
15
16     ser_bytes = (ser.readline()).decode("utf-8")
17
18     if ser_bytes[0] == "C":
19         C = ser_bytes[1:-2]
20         #print(C)
21     elif ser_bytes[0] == "R":
22         R = ser_bytes[1:-2]
23         #print(R)
24     elif ser_bytes[0] == "V":
25         V = ser_bytes[1:-2]
26         #print(V)
27     outlet.push_sample([V])
28
```

459

460

Figure 27. Python script for receiving data from Serial port and sending it to LSL

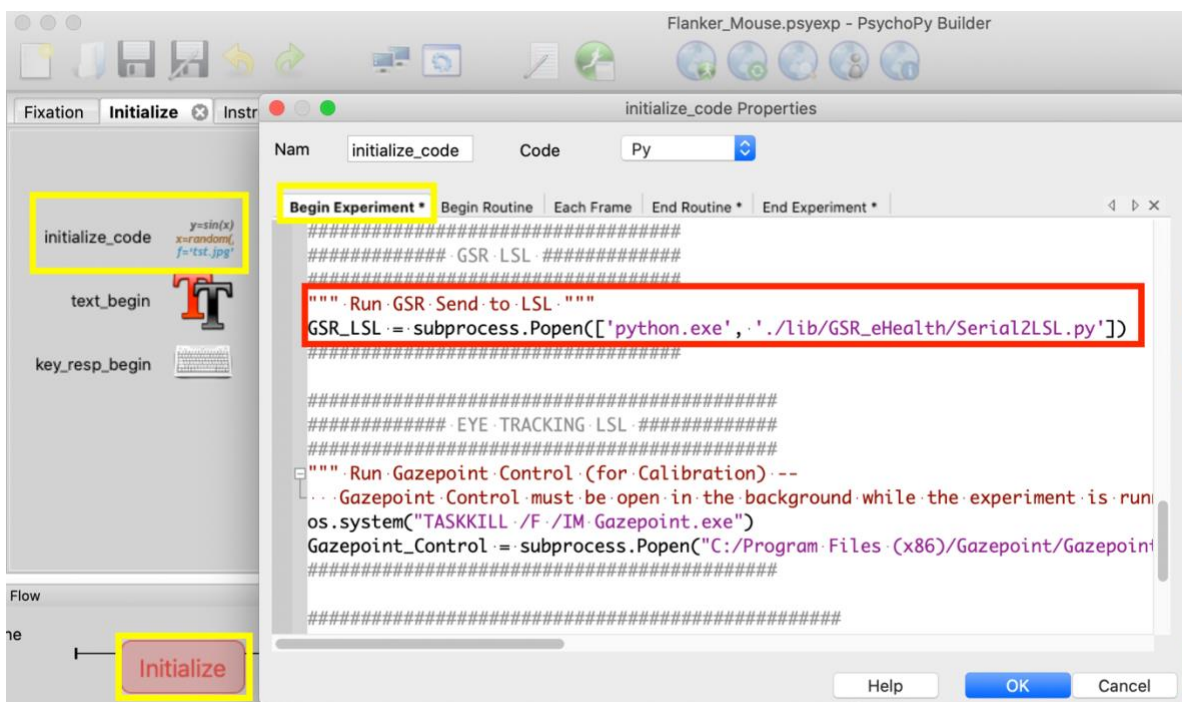

461

462

Figure 28. Calling the Python script for sending Arduino data to LSL

463

464

465

466

467

GSR data can be analyzed using **ledalab** (a MATLAB Toolbox) which can be downloaded from <http://www.ledalab.de/>. To analyze the data in **ledalab**, the *.xdf* file needs to be opened in MATLAB workspace (See Appendix). In the next subsection, it is shown how to send **GSR** data from the **Gazepoint Biometrics** kit (along with Gazepoint eyetracking data) to LSL.

468 4.3.4 Mouse Data + Flanker task markers + EEG + GSR + Eyetracking

469 First, download the Gazepoint installer from <https://www.gazept.com/downloads/> to install the  
470 Gazepoint Control application. This application is used for eyetracking calibration and needs to be  
471 run in the background of the experiment while collecting the data from Gazepoint. We have  
472 developed a Python script using Gazepoint SDK to send eyetracking and biometrics data (GSR, heart-  
473 rate, etc.) to LSL. This Python script can be accessed by downloading the folder  
474 *Gazepoint(Eyetracking+Biometrics)-LSL* from our GitHub:  
475 [https://github.com/moeinrazavi/MultiModal\\_MultiSensory\\_Flanker\\_Task/tree/master/lib](https://github.com/moeinrazavi/MultiModal_MultiSensory_Flanker_Task/tree/master/lib). The  
476 folder should be added to the experiment *lib* folder. The lines of code in Figure 29 are used to open  
477 Gazepoint Control. Then the code in Figure 30 is used to minimize the experiment screen to have  
478 access to Gazepoint Control for calibration. And finally, Figure 31 shows the code to check whether  
479 the Gazepoint Control is not closed by the user, and by running the *LSLGazepoint.py* as a subprocess,  
480 it starts sending data to LSL.

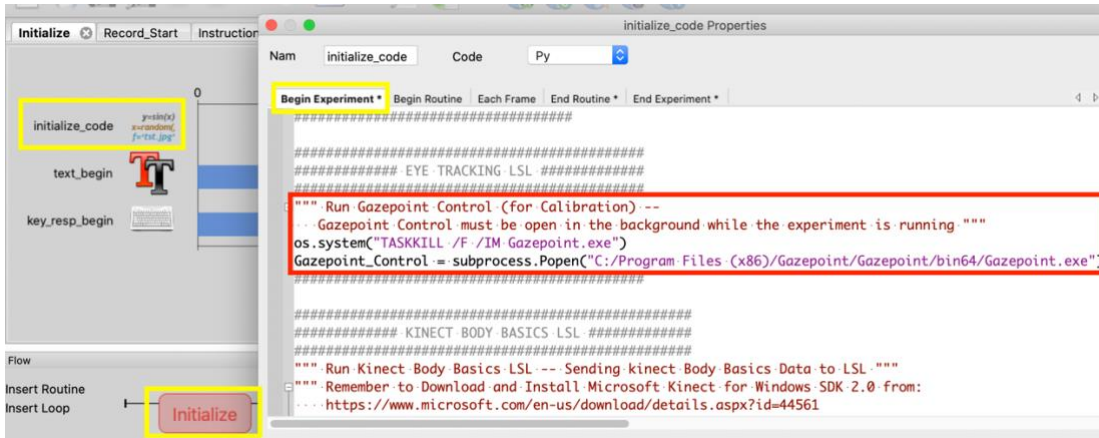

```
initialize_code Properties
Name: initialize_code
Code: Py

Begin Experiment *
#####
##### EYE TRACKING LSL #####
#####

""" Run Gazepoint Control (for Calibration) --
    ..Gazepoint Control must be open in the background while the experiment is running """
os.system("TASKKILL /F /IM Gazepoint.exe")
Gazepoint_Control = subprocess.Popen("C:/Program Files (x86)/Gazepoint/Gazepoint/bin64/Gazepoint.exe")
#####

##### KINECT BODY BASICS LSL #####
#####

""" Run Kinect Body Basics LSL -- Sending kinect Body Basics Data to LSL """
""" Remember to Download and Install Microsoft Kinect for Windows SDK 2.0 from:
    ... https://www.microsoft.com/en-us/download/details.aspx?id=44561 """
```

481

482 Figure 29. Script for running Gazepoint Control application.

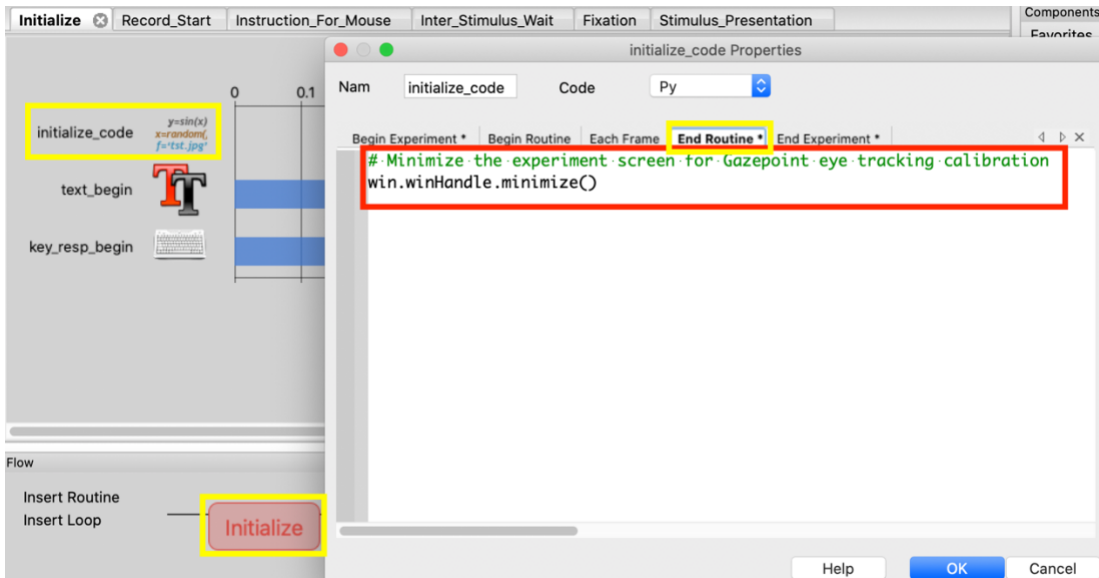

```
initialize_code Properties
Name: initialize_code
Code: Py

Begin Experiment * Begin Routine Each Frame End Routine * End Experiment *
#####

# Minimize the experiment screen for Gazepoint eye tracking calibration
win.winHandle.minimize()
```

483

484 Figure 30. Script for minimizing the experiment screen to access the Gazepoint Control calibration

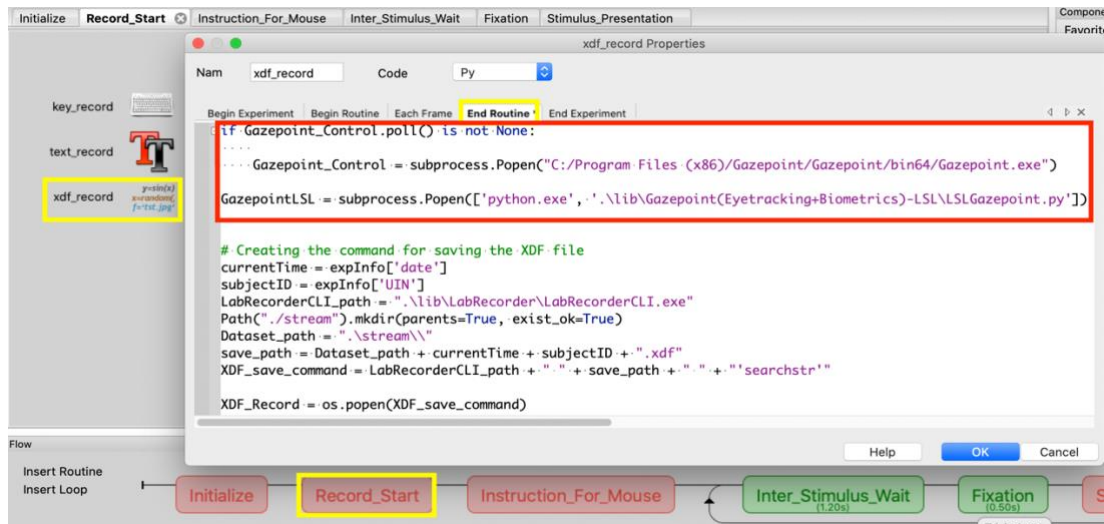

485  
486  
487

**Figure 31.** If Gazeport Control closed by the user, run it again and send Gazeport eyetracking (+ GSR and heartrate) to LSL

488

#### 4.3.5 Mouse Data + Flanker task markers + EEG + GSR + Eyetracking + Body Motion

489  
490  
491  
492  
493  
494  
495  
496

Kinect for Windows v2 is used to record body motion. To do so, the Microsoft Kinect for Windows SDK 2.0 should be downloaded from <https://www.microsoft.com/en-us/download/details.aspx?id=44561>. We have developed a C++ application based on Kinect Body Basics SDK to send data from a connected Kinect device to LSL. This application can be accessed by downloading the folder *Kinect-BodyBasics-LSL* from our GitHub: <https://github.com/moeinrazavi/Kinect-BodyBasics-LSL> and copying this folder in the experiment *lib* folder. Then, the code shown in Figure 32 should be added to the **Begin Experiment** tab of **initialize\_code** in the **Initialize** routine.

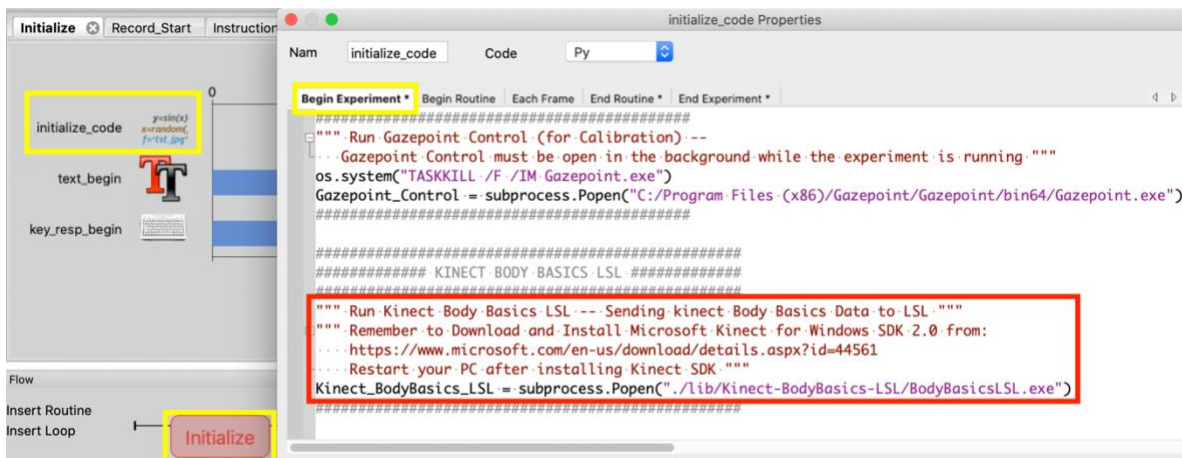

497  
498

**Figure 32.** Running the application for sending Kinect body motion data to LSL

499  
500

At the end of experiment, in order to stop recording, the lines of code shown in Figure 33 can be added to the **End Experiment** tab.

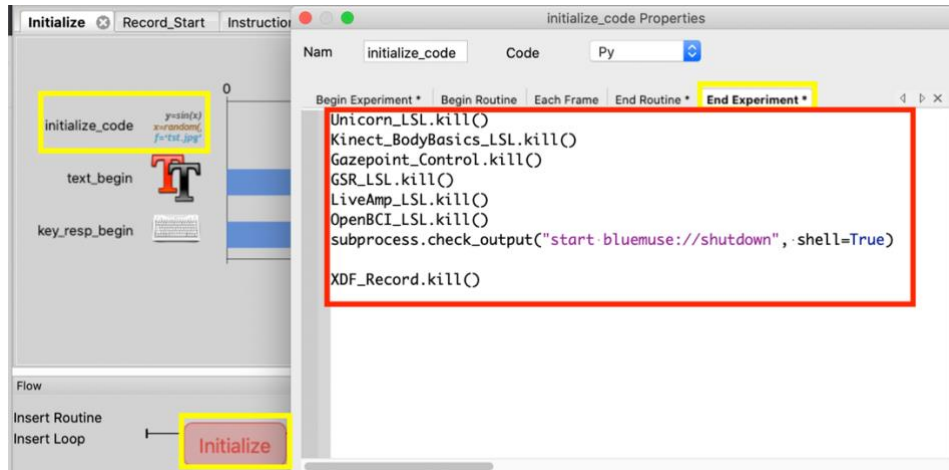

501  
502

Figure 33. Script for stop recording the data from all the devices

### 503 5. Building a Multisensory Virtual Reality (VR) Experiment (Unity)

504 In this section, first it is shown how to create simple interactable game objects in a VR  
505 environment using **Unity**. Then, a tutorial is provided on how to synchronize VR environment data  
506 (e.g., objects positions and orientations), user data (i.e., marker for pressing HTC VIVE controller  
507 trigger, positions of player and controllers), and data from multiple devices such as EEG (g.tec  
508 Unicorn, Muse, Neurosky Mindwave, BrainProducts LiveAmp, OpenBCI Cyton and OpenBCI Cyton  
509 + Daisy), GSR (e-Health Sensor Platform v2.0 for Arduino), Eyetracking (HTC VIVE Pro with Tobii  
510 Eyetracking), and Body Motion (Kinect) together by LSL. Finally, it is explained how to embed  
511 **LabRecorder** in **Unity** to save data automatically on disk.

#### 512 5.1. Software and Plugin Installation

513 In order to design a VR environment, **Unity** (<https://unity3d.com/get-unity/download>) and  
514 **Steam** (<https://store.steampowered.com/about/>) need to be installed which are available to download  
515 for free.

#### 516 5.2. Create simple interactable objects in VR environment

517 After installing **Unity** and Steam, in order to create a VR environment in Unity, a new 3D project  
518 should be created from Projects part in Unity Hub (Figure 34).

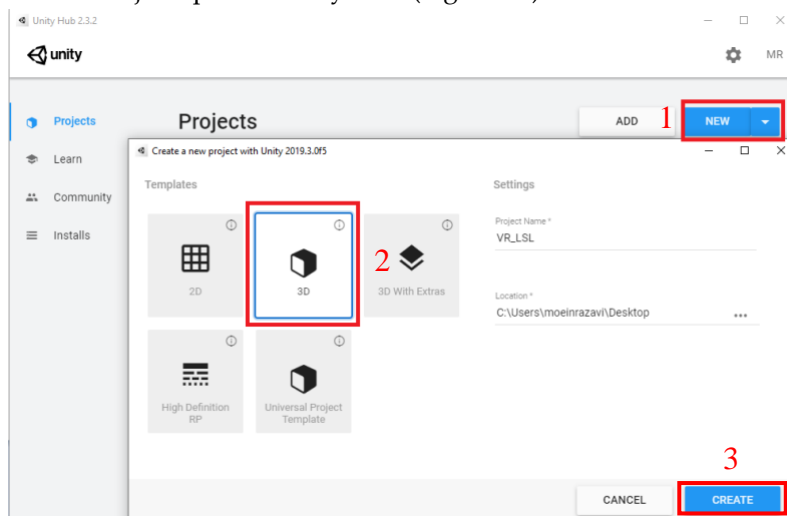

519  
520

Figure 34. Create a new 3D project in Unity

521 After creating the project, there is a Main Camera object in **Unity** SampleScene which is fixed to  
522 the environment and useless for **VR** purposes (Figure 35). It will be shown later how to attach a  
523 camera object to the player that can move with it.

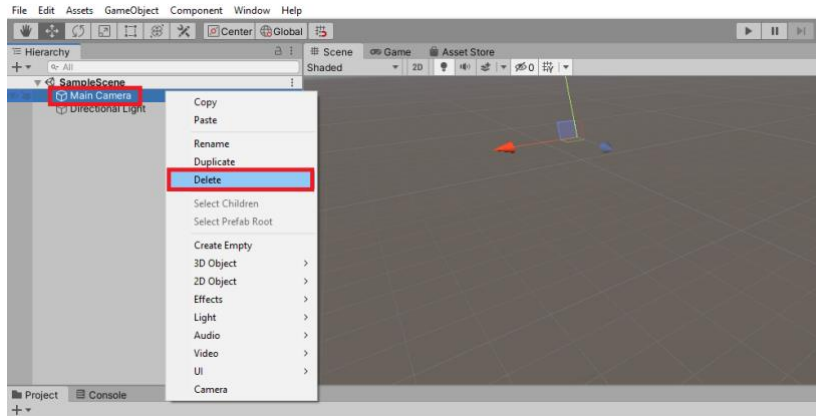

524

525

Figure 35. Delete Main Camera object from the Scene

526 To utilize **VR** properties and functions, SteamVR Plugin should be imported to the project.  
527 SteamVR Plugin can be downloaded and imported from Asset Store in **Unity**. In the pop-up windows  
528 that appear after importing SteamVR Plugin, "import" (Figure 36.a) and "Accept All" (Figure 36.b)  
529 should be selected, respectively.  
530

531

532

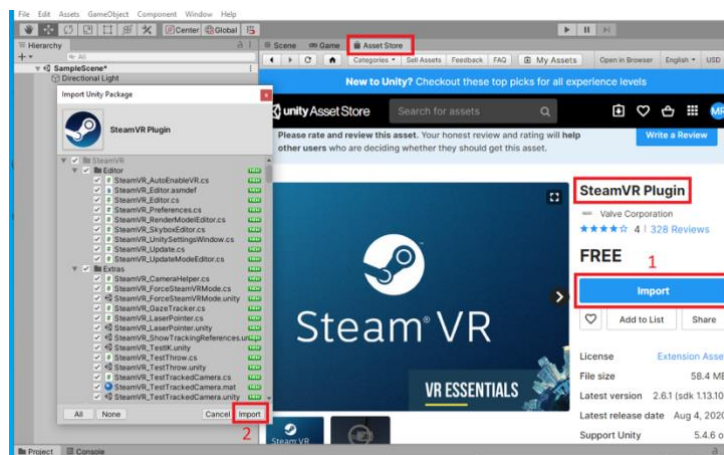

Figure 36. a. Import SteamVR Plugin

533

534

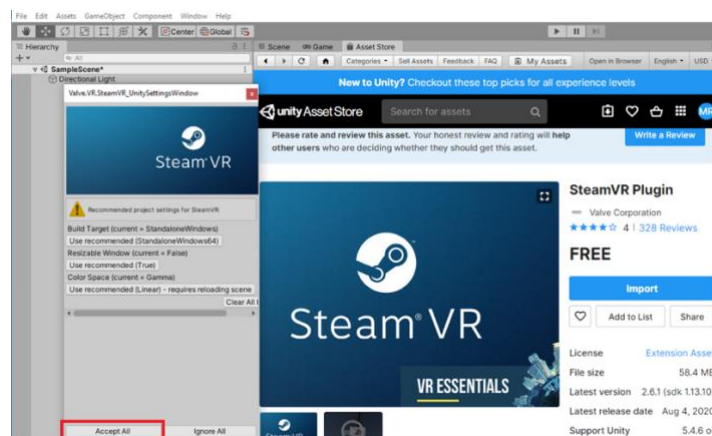

Figure 36. b. Import SteamVR Plugin



535 Next, simple objects (e.g., Plane and Cube) are added to the Scene (Figure 37). To make the  
536 objects interactive with the user, first the **Interactable** and then **Throwable** features should be added  
537 to the **Cube** object (Figure 38). By doing this, the user can move and throw the Cube object.

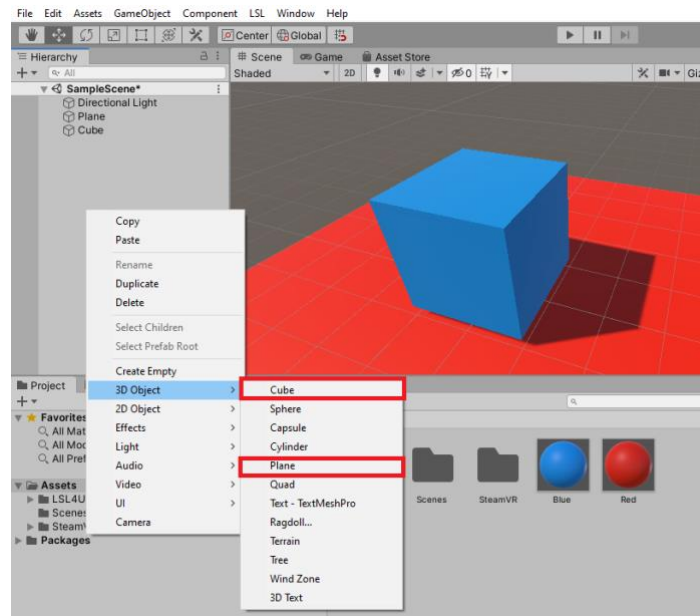

538

539

Figure 37. Add Plane and Cube objects to the Scene

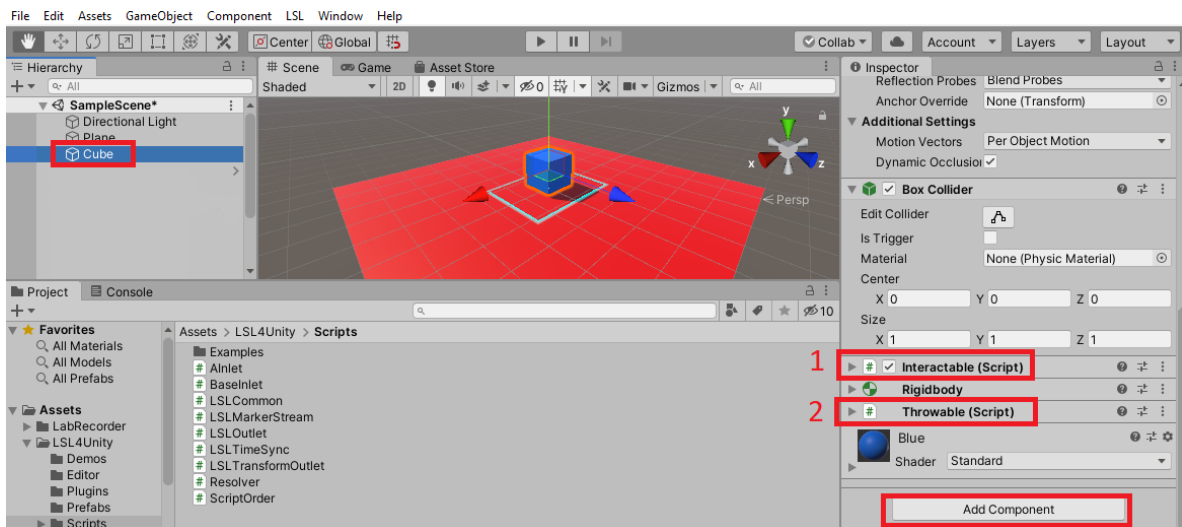

540

541

Figure 38. Add **Interactable** and then **Throwable** components to the **Cube**

542 Then a Player object is added to the Scene by dragging it to the Scene (Figure 39). The Player  
543 object will define the position of the user in the **VR** environment. After that, [CameraRig] object is  
544 added to the Player by dragging it to the Player (Figure 40). This will attach the **VR** camera and  
545 controllers (here HTC VIVE Pro camera and controllers) to the Player object.  
546

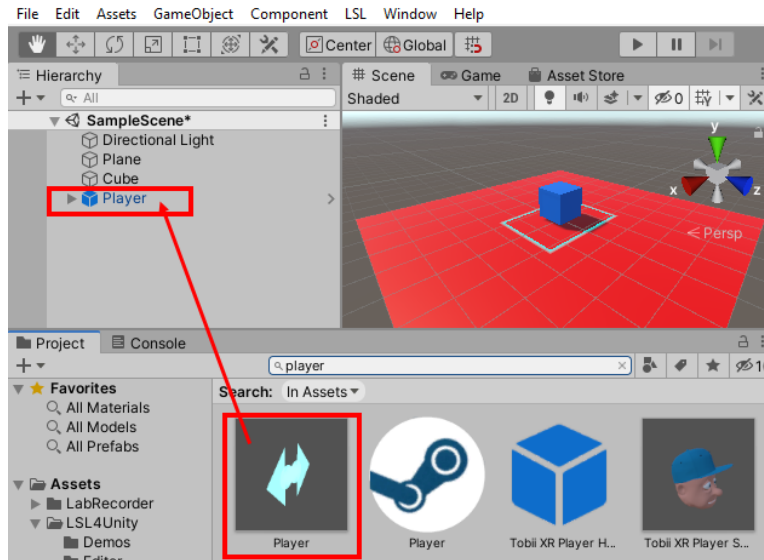

547  
548

Figure 39. Add Player object to the Scene

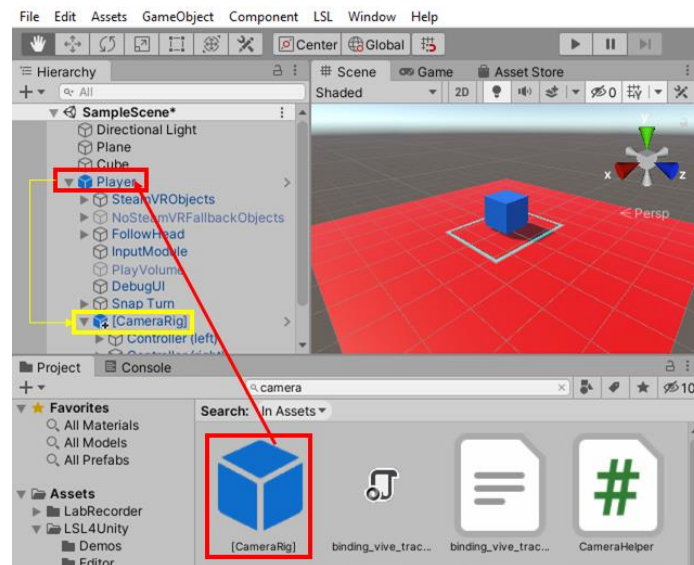

549  
550

Figure 40. Add [CameraRig] object to the Player

551 In the following, it is shown how to synchronize the data from the VR environment, user and  
552 different devices using LSL.

### 553 5. 3. Synchronize data from VR, user and different devices by LSL

554 In this step, to use LSL features, LSL4Unity plugin should be added to the Assets folder in the  
555 main project folder (here VR\_LSL). In addition, to send HTC VIVE eyetracking and controller trigger  
556 press data to LSL, we developed two C# scripts which should also be added to the Assets folder  
557 (Figure 41). The LSL4Unity plugin and these scripts can be accessed from our GitHub:  
558 [https://github.com/moeinrazavi/VR\\_LSL](https://github.com/moeinrazavi/VR_LSL).

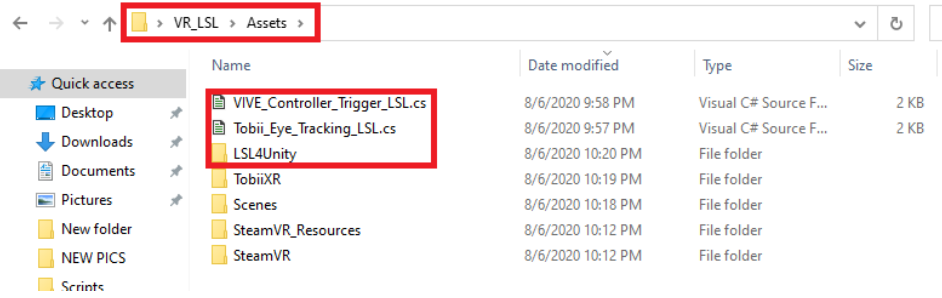

559

560

561

**Figure 41.** Add LSL4Unity plugin and developed scripts for sending HTC VIVE eyetracking and controller trigger press data to LSL in the project's Assets folder.

562

### 5.3.1 Send VR objects data to LSL

563

564

565

566

567

568

569

570

571

572

Each object in **Unity** has a component named Transform which defines the Position and Rotation of that object in the environment (Figure 42). The LSLTransformOutlet function in **LSL4Unity** plugin can be attached to each object and send data from its Transform component to **LSL**. Figure 43 shows how to add this function to the Cube object by dragging the function to the object. The Sample Source field of this function should be set to the object that its Transform data needs to be sent to **LSL** (Figure 43). The LSLTransformOutlet function provides up to 3 types of data to be sent to **LSL**. The first type contains 4 channels that send the rotation data in the Quaternion system (angles with x,y,z and w axes); the next one has 3 channels that are associated with the rotation data in the Euler system (angles with x,y and z axes). The last one includes 3 channels that send the position data (x, y and z coordinates) to **LSL** (Figure 44).

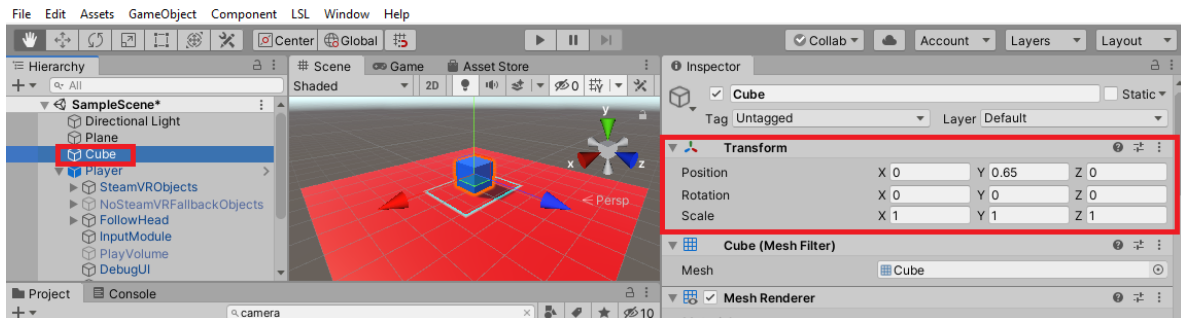

573

574

**Figure 42.** Transform component of an object

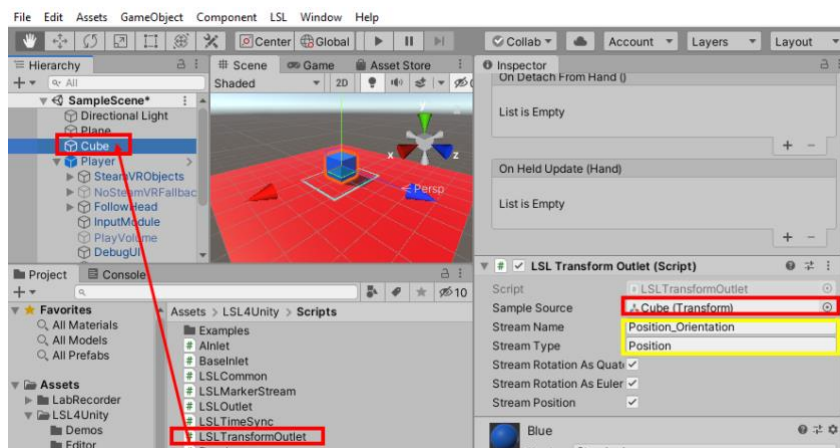

575

576

**Figure 43.** Add LSLTransformOutlet function to the Cube object

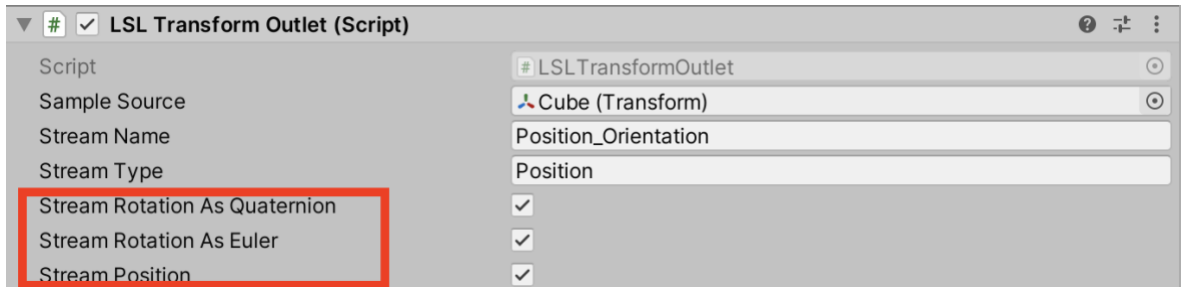

577

578

Figure 44. LSLTransformOutlet data streaming choices

579

### 5.3.2 Send VR objects data + user data to LSL

580

Here it is shown how to send the camera rotation, camera position coordinates and controller trigger press markers to LSL. The camera is attached to the Player object.

581

582

583

584

585

586

First, to send the camera rotation and position data to LSL, similar to the previous subsection, the LSLTransformOutlet function is attached to Camera object under the Player object and Camera is chosen as the Sample Source of this function (Figure 45). Similar to camera, the position and rotation of the controllers can be sent to LSL by attaching LSLTransformOutlet function to the Transform component of each controller (not shown here for brevity).

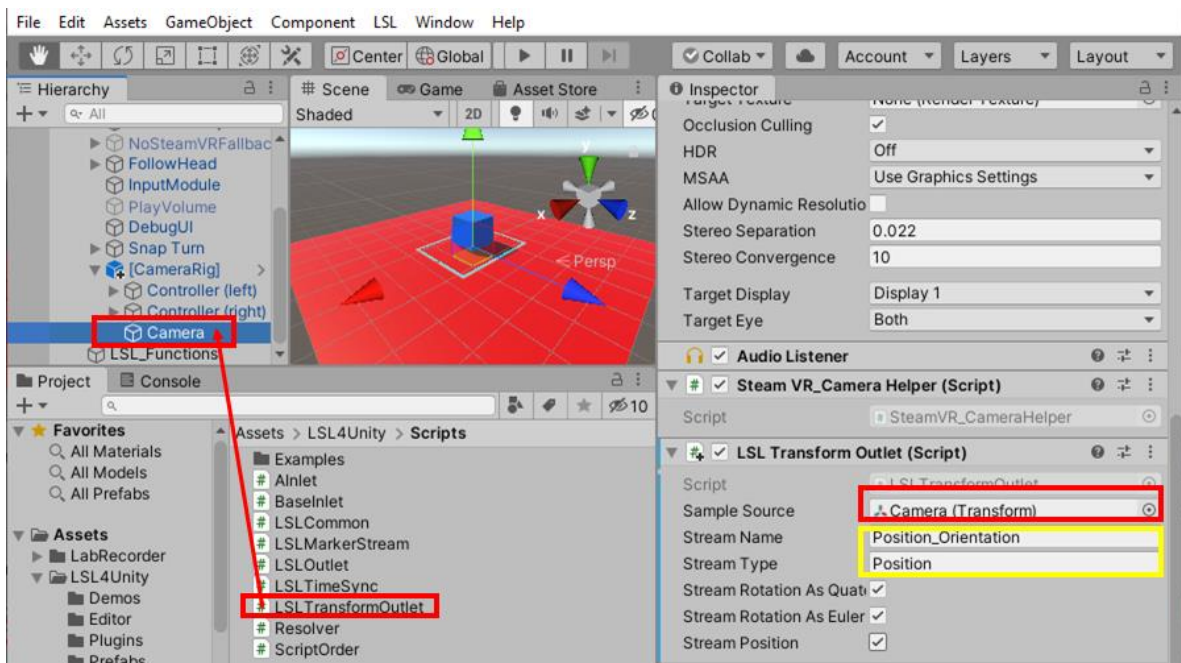

587

588

Figure 45. Add LSLTransformOutlet function to the Camera object

589

590

591

Then, to have access to controllers, SteamVR Input need to be generated by clicking on SteamVR Input in Window tab. On every pop-up window that appears, **Yes** and finally **Save and generate** buttons should be selected (Figure 46). The SteamVR Input makes controller button actions accessible.

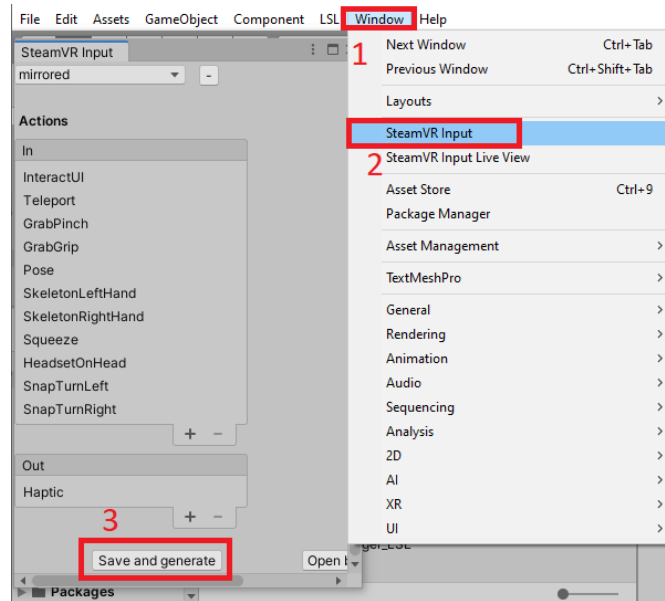

592

593

Figure 46. Generate SteamVR Input

594

### 5.3.3 Send VR objects data + user data + data from different devices to LSL

595

In order to send data from controllers, eyetracking and other devices, an empty GameObject is created and added to LSL\_Functions (Figure 47).

596

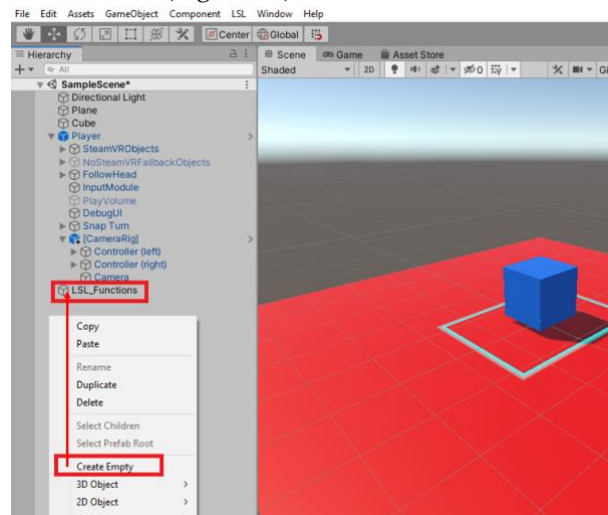

597

598

Figure 47. Create an empty GameObject (here renamed to LSL\_Functions)

599

We have developed C# scripts to send data from different devices to LSL. In the following, it is shown how to add these scripts to LSL\_Functions object, step by step. A brief explanation for some of the scripts is also provided.

600

601

602

- **Sending controller trigger press marker to LSL**

603

To send the controller trigger press markers to LSL, the **Steam VR\_Activate Action Set On Load** function needs to be added to LSL\_Functions object. This function allows access to controller button actions. The Action Set in this function must be set to `\actions\default`. Then the **VIVE\_Controller\_Trigger\_LSL** script that we have developed in C# and the **LSL Marker Stream** function need to be added to LSL\_Functions. The **VIVE\_Controller\_Trigger\_LSL** function uses **LSL Marker Stream** to send controller trigger press data to LSL (Figure 48). In **VIVE\_Controller\_Trigger\_LSL** panel, the `Trigger_Data` should be set on `\actions\default\in\GrabPinch`; this will assign the action of sending data to LSL to the controller

604

605

606

607

608

609

610

611 trigger. Choosing Right Hand or Left Hand for the **Hand Type**, will determine whether to send data  
612 from the right-hand or the left-hand controller to LSL.

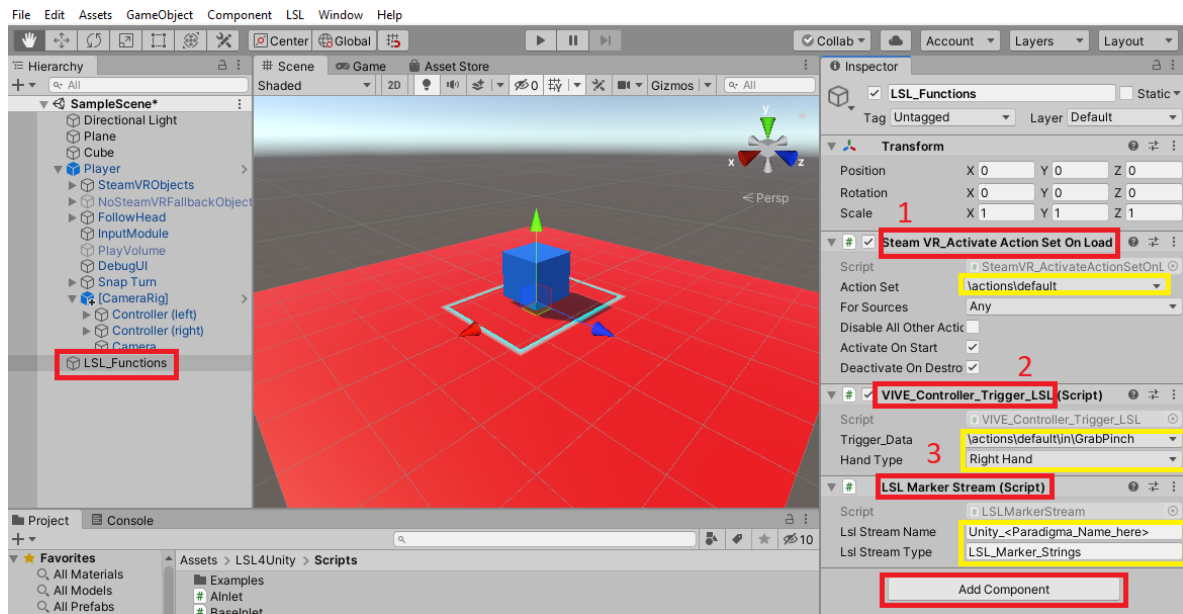

613

614

Figure 48. Add the scripts to send controller trigger press data to LSL

615 • **Sending Eyetracking data to LSL**

616 In order to send the Eyetracking (HTC VIVE Pro with Tobii Eyetracking) data to LSL, first, Tobii  
617 XR SDK for **Unity** needs to be downloaded from <https://vr.tobii.com/sdk/downloads/>. Then, while  
618 the project is open, opening the downloaded file will start importing the required libraries for Tobii  
619 eyetracking in **Unity**.

620 Then the **Tobii\_Eye\_Tracking\_LSL** function that we developed with C# should be added to the  
621 **LSL\_Functions** object (Figure 49).

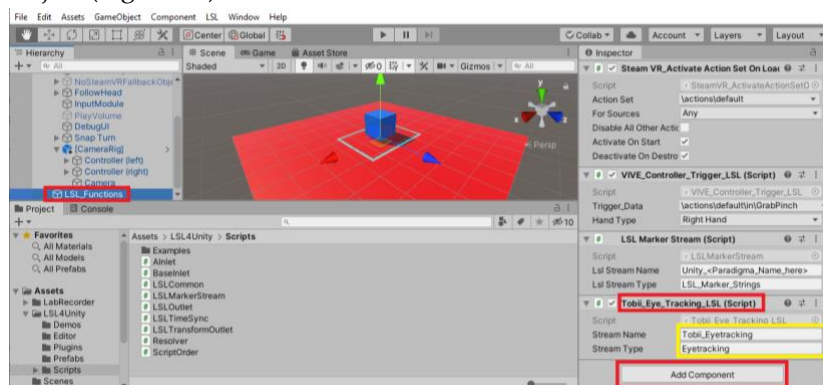

622

623

Figure 49. Add the script to send eyetracking data to LSL

624 • **Send data from other devices to LSL**

625 Here it is shown how to send data from other devices (EEG (g.tec Unicorn, Muse, Neurosky  
626 Mindwave, BrainProducts LiveAmp, OpenBCI Cyton and OpenBCI Cyton + Daisy), GSR (e-Health  
627 Sensor Platform v2.0 for Arduino), and Body Motion (Kinect)) to LSL. To do that, first, the required  
628 folders should be downloaded from our GitHub and copied in the **Assets** folder (Figure 50). Also, the  
629 **Multiple\_Devices\_LSL** script that we developed in C# needs to be copied it in the **Assets** folder  
630 (Figure 51). This script uses Windows Command Prompt to automatically send data from the devices  
631 mentioned above to LSL (Figure 52).

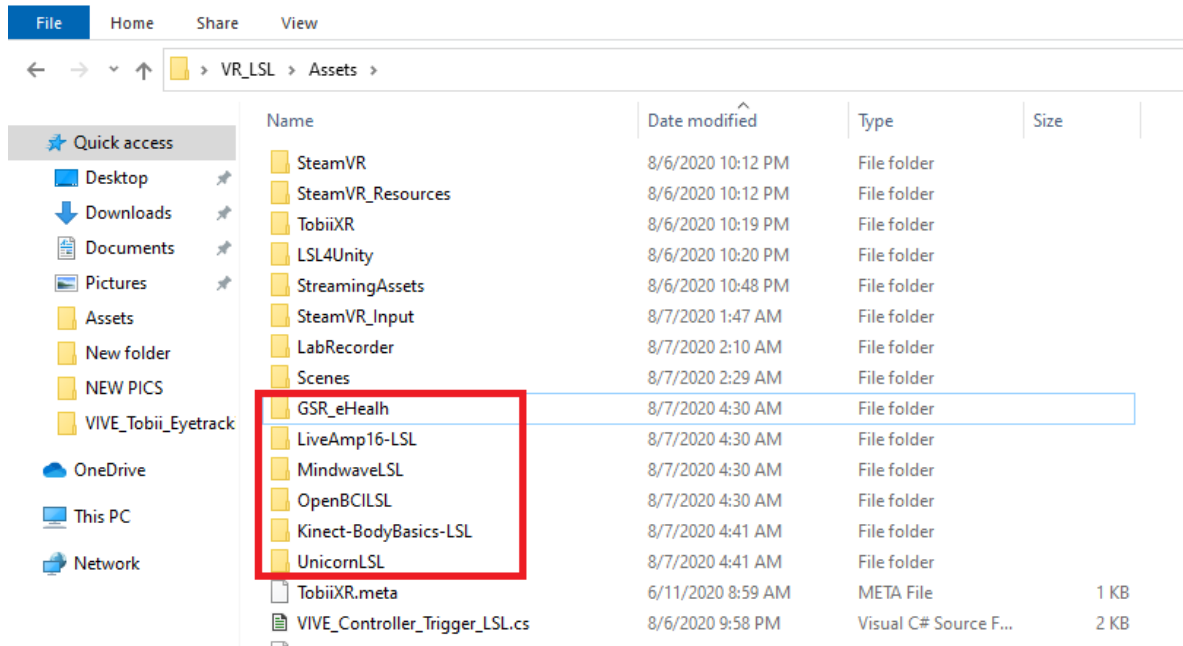

632

633

Figure 50. Add files associated with different devices to the *Assets* folder

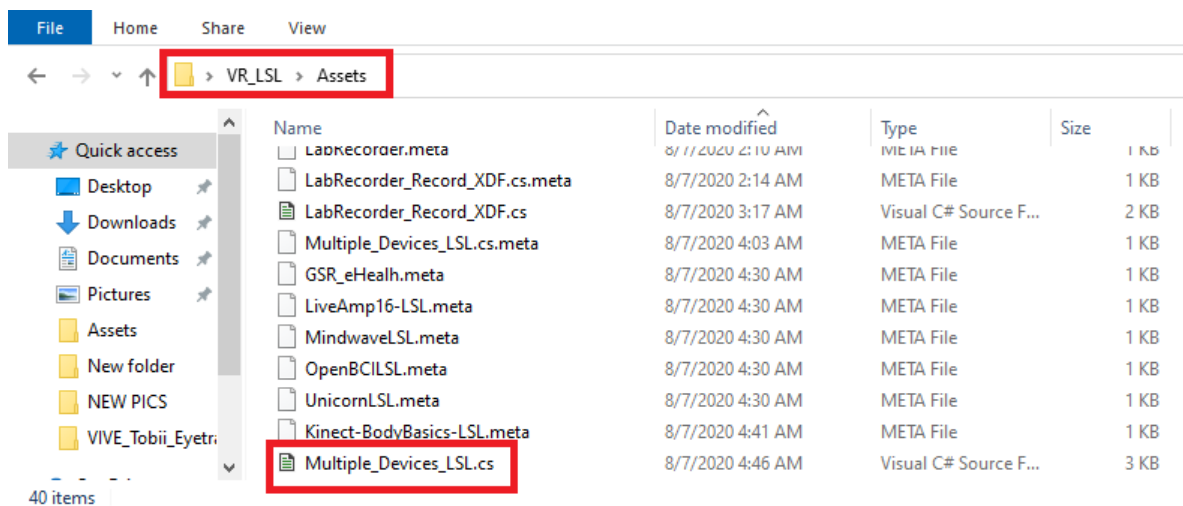

634

635

Figure 51. Add the *Multiple\_Devices\_LSL* script to *Assets* folder

636

```
1 using System.Collections;
2 using System.Collections.Generic;
3 using UnityEngine;
4
5 public class Multiple_Developes_LSL : MonoBehaviour
6 {
7     // Start is called before the first frame update
8     void Start()
9     {
10         //*****
11         //***** EEG LSL *****
12         //*****
13         //***** Run Unicorn LSL -- Sending Unicorn Data to LSL ***
14         System.Diagnostics.Process.Start("CMD.exe", @"%C .\Assets\UnicornLSL\UnicornLSL.exe"); 1
15         //***** Run BrainProducts LiveAmp - 16 Channel LSL -- Send LiveAmp Data to LSL ***
16         System.Diagnostics.Process.Start("CMD.exe", @"%C .\Assets\LiveAmp16-LSL\LiveAmp-LSL.exe"); 2
17         //***** Run OpenBCI Send Data to LSL ***
18         System.Diagnostics.Process.Start("CMD.exe", @"%C python .\Assets\OpenBCILSL\OpenBCILSL.py"); 3
19         //***** Send Mindwave data to LSL --
20         //Remember to install Mindwave LSL using: pip install mindwavelsl ***
21         System.Diagnostics.Process.Start("CMD.exe", @"%C python .\Assets\MindwaveLSL\mindwave_LSL.py"); 4
22         //***** Send Muse data to LSL ***
23         //***** Download and Install BlueMuse from:
24         // https://github.com/kowalej/BlueMuse/releases/download/v2.1/BlueMuse_2.1.0.0.zip
25         // 1.Navigate to the unzipped app folder and run the .\InstallBlueMuse.ps1 PowerShell
26         // command(right click and choose Run with PowerShell or execute from terminal directly):
27         // 2.Follow the prompts -the script should automatically
28         // install the security certificate, all dependencies, and the BlueMuse app.
29         // Reference: https://github.com/kowalej/BlueMuse ***
30         // Set LSL_LOCAL_CLOCK for MUSE and Send Muse Data to LSL
31         System.Diagnostics.Process.Start("CMD.exe", @"%C start blueMuse://setting?key=primary_timestamp_format=value=LSL_LOCAL_CLOCK_NATIVE");
32         System.Diagnostics.Process.Start("CMD.exe", @"%C start blueMuse://start?streamfirst=true");
33
34         //*****
35         //***** GSR LSL *****
36         //*****
37         //***** Run GSR Send to LSL ***
38         System.Diagnostics.Process.Start("CMD.exe", @"%C python .\Assets\GSR_eHealth\Serial2LSL.py"); 6
39
40         //*****
41         //***** KINECT BODY BASICS LSL *****
42         //*****
43         //***** Run Kinect Body Basics LSL -- Sending Kinect Body Basics Data to LSL ***
44         //***** Remember to Download and Install Microsoft Kinect for Windows SDK 2.0 from:
45         // https://www.microsoft.com/en-us/download/details.aspx?id=44561
46         // Restart your PC after installing Kinect SDK ***
47         System.Diagnostics.Process.Start("CMD.exe", @"%C .\Assets\Kinect-BodyBasics-LSL\BodyBasicsLSL.exe"); 7
48     }
49     // Update is called once per frame
50     void Update()
51     {
52
53
54 }
```

637

638

639

Figure 52. Multiple\_Developes\_LSL script: Send data from 1) g.tec Unicorn, 2) BrainProducts LiveAmp, 3) OpenBCI, 4) NeuroSky Mindwave, 5) Muse, 6) eHealth v2 GSR sensor and 7) Kinect to LSL

640

641

In Figure 53, it is shown how to add Multiple\_Developes\_LSL script to LSL\_Functions object in Unity.

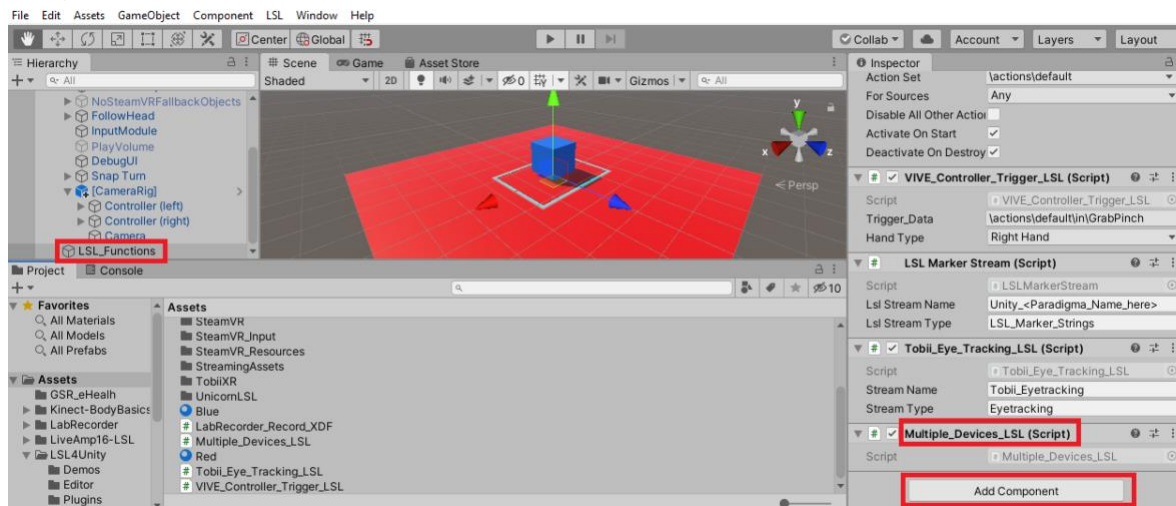

642

643

Figure 53. Add the Multiple\_Developes\_LSL script to LSL\_Functions object

644

645

In the following, it is shown how to call LabRecorder to start recording the data available on LSL automatically by embedding LabRecorder in Unity.

646

647

648

649

First, the LabRecorder folder available on our GitHub ([https://github.com/moeinrazavi/VR\\_LSL/tree/master/Assets/LabRecorder](https://github.com/moeinrazavi/VR_LSL/tree/master/Assets/LabRecorder)) is added to the Assets folder (Figure 54). Also, the script LabRecorder\_Record\_XDF that we developed in C# should be added to the Assets folder (Figure 55). Then the LabRecorder\_Record\_XDF script must be added to



650 the LSL\_Functions object (Figure 56). By doing this, when the Play button is pressed in Unity, all the  
651 data sent to LSL will start being recorded automatically.

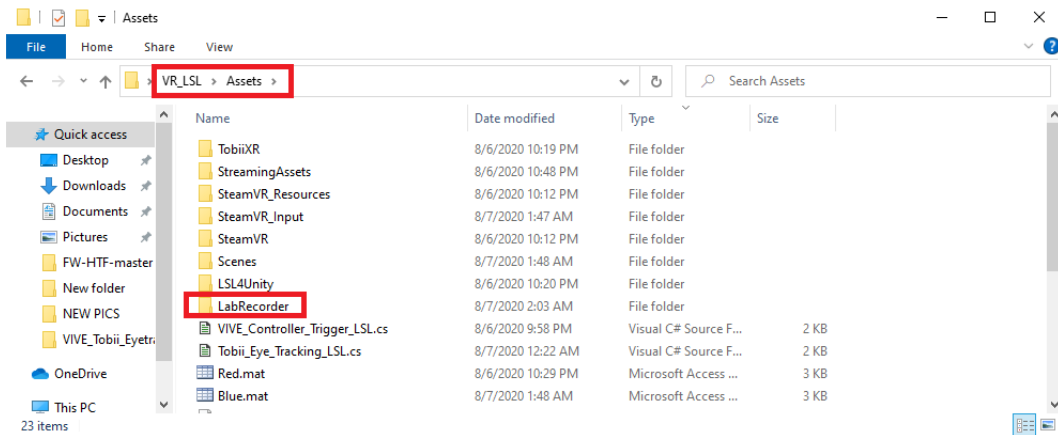

652

653 **Figure 54.** Add the LabRecorder file to Assets folder

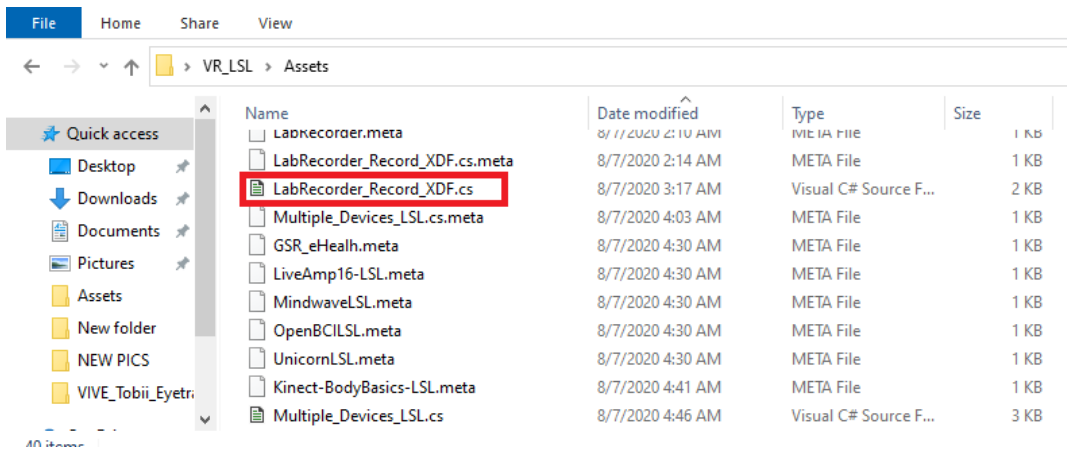

654

655 **Figure 55.** Add the LabRecorder\_Record\_XDF script to Assets folder

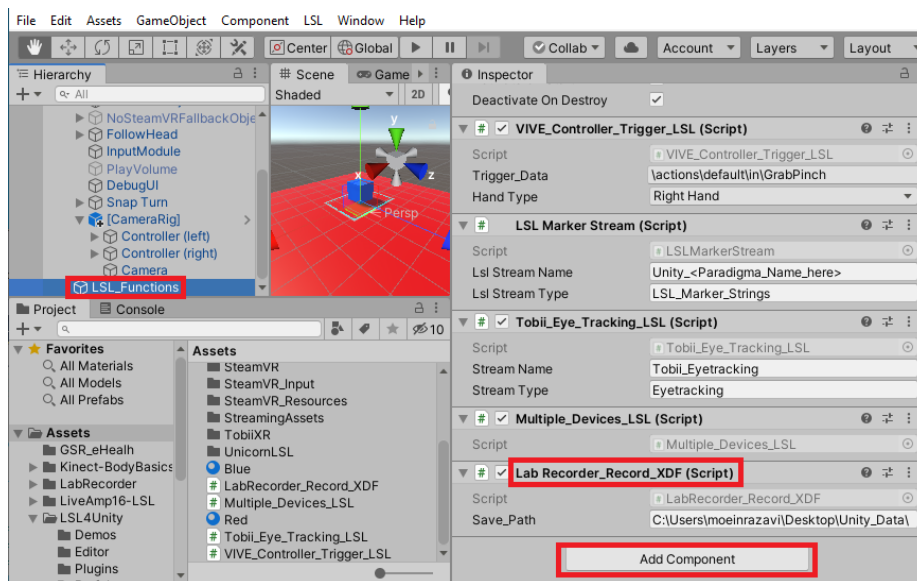

656

657 **Figure 56.** Add the LabRecorder\_Record\_XDF script to LSL\_Functions object

## 658 6. Results and Discussion

### 659 6.1. Results

660 After the experiment is finished, for both **PsychoPy** and **Unity** projects, all the streams will be  
661 saved with their associated timestamps in a single *.xdf* file. Each stream can be easily accessed with  
662 the assigned **name**, **type** and **source\_id** inside the Python script, MATLAB script or **EEGLAB** toolbox.  
663 Ojeda et al. (2014) created an open-source **EEGLAB** toolbox, **MoBILab**, for analyzing data from  
664 multiple sensors at the same time (EEG, body motion, eye movement, etc.) [25].

665 In order to open *.xdf* file using Python, see Appendix.

### 666 6.2. Discussion and Future Work

667 The ability to use multiple measures that are synchronized together to distinguish factors  
668 affecting behavior and brain functionality is getting more attention. Previous works have mostly used  
669 one or a couple of measures to study the human mind and behavior. Some studies showed that using  
670 various measures (multimodal experiments) can improve the accuracy and the confidence for  
671 interpretation of the results. That said, an accurate and easy to use system to integrate and  
672 synchronize multiple measures with different sampling rates is often lacking. In this paper, a practical  
673 and comprehensive method on integrating and synchronizing multiple different measures together  
674 is provided. We developed some applications that make the integration process easier and accessible  
675 for different devices. Once the experiment is created and all the streams are defined, it is  
676 straightforward for the experimenter to run the experiment for each subject as everything starts being  
677 recorded and saved on the disk automatically. It is also very time-saving in preparing the system for  
678 the multisensory experiments. An important customizable feature of the proposed system, which is  
679 useful for Brain-Computer Interface and Neurofeedback purposes, is that the user can easily define  
680 markers for special behaviors of the signals (e.g. abrupt changes in the signals) [26]. It is expected that  
681 for future works, adding stimuli from multiple sources that involve different human senses (e.g.,  
682 tactile, hear, smell, taste, etc.) can result in higher accuracy and new findings. For instance, Marsja et  
683 al. (2019) found that changes in bimodal stimuli (both visual and auditory) conveyed a shift in the  
684 performance of spatial and verbal short-term memory tasks, while changes in visual or auditory  
685 stimuli individually did not lead to a significant shift in the performance of the mentioned tasks [27].  
686 This can be easily achieved by the aid of our proposed system, by sending the markers indicating the  
687 onset, offset, and other information related to multiple stimuli in different streams simultaneously.  
688 As multimodal behavioral data are interwoven, using methods that enable the fusion of multimodal  
689 data would obtain a wide range of new findings in the human brain and behavior research that have  
690 never been found before. For this purpose, the state-of-the-art deep learning models are powerful  
691 tools that have recently been used for combining and analyzing data from multiple sources together.  
692 Gao et al. 2020 conducted a survey study on using deep learning techniques for multimodal data  
693 fusion and how they can help find new interpretations of the data [28]. Thus, deep learning models  
694 can be beneficial for multimodal data obtained from human studies as well.

## 695 Appendix

### 696 *Install PsychoPy and pylsl*

697 On windows, install the standalone version of **PsychoPy** from  
698 <https://www.psychopy.org/download.html>.

### 699 *Install pylsl module on PsychoPy*

700 In order to install **pylsl** (version≥1.13) on PsychoPy using pip. To install **pylsl** on **PsychoPy** use  
701 the command: "C:\Program Files\PsychoPy3\python.exe" -m pip install pylsl --user in Windows  
702 command line.

703

704

### 705 Opening .xdf file in Python

706 In order to open .xdf file in Python, first it is required to install **pyxdf** in python using pip in  
707 command line: **pip install pyxdf**. The .py file in the link: [pyxdf example](#), is an example of opening  
708 .xdf files in Python. It is recommended to use **Spyder** (<https://docs.spyder-ide.org/installation.html>)  
709 as the Python platform to open the .xdf files, since the Variable Explorer panel in **Spyder** allows to  
710 track the variables. The fields of a .xdf file in Python are shown in shown Figure A1.

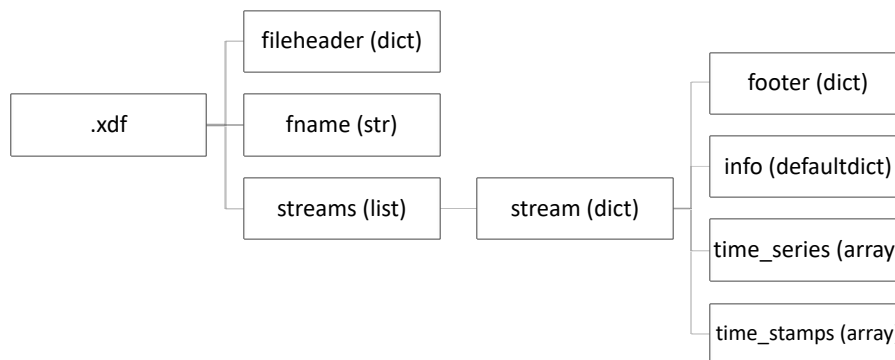

711

712 **Figure A1.** Fields of a .xdf file in Python

### 713 Opening .xdf file in MATLAB

714 In order to open .xdf file in MATLAB, first the folder including the *load\_xdf.m* function  
715 (download from [xdf importer GitHub](#)) should be added to MATLAB path (using Set Path in  
716 MATLAB Home tab). Then, the .xdf file can be loaded in MATLAB workspace by running  
717 **load\_xdf("ADDRESS\_TO\_XDF\_FILE.xdf")** in MATLAB command window. The fields of a .xdf file  
718 in MATLAB are shown in shown Figure A2.

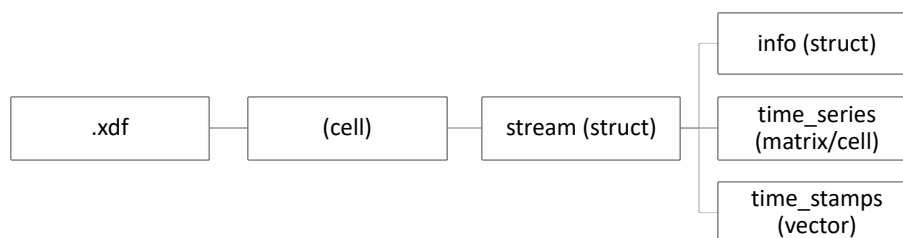

719

720 **Figure A2.** Fields of a .xdf file in MATLAB

## 721 References

- 722 1. Otto, T.U.; Dassy, B.; Mamassian, P. Principles of multisensory behavior. *J. Neurosci.* **2013**, *33*, 7463–  
723 7474, doi:10.1523/JNEUROSCI.4678-12.2013.
- 724 2. Critchley, H.D.; Mathias, C.J.; Josephs, O.; O'Doherty, J.; Zanini, S.; Dewar, B.K.; Cipolotti, L.; Shallice,  
725 T.; Dolan, R.J. Human cingulate cortex and autonomic control: Converging neuroimaging and clinical  
726 evidence. *Brain* **2003**, *126*, 2139–2152, doi:10.1093/brain/awg216.
- 727 3. Höchenberger, R.; Busch, N.A.; Ohla, K. Nonlinear response speedup in bimodal visual-olfactory  
728 object identification. *Front. Psychol.* **2015**, *6*, 1–11, doi:10.3389/fpsyg.2015.01477.
- 729 4. Kittler, J.; Hatef, M.; Duin, R.P.W.; Matas, J. On combining classifiers. *IEEE Trans. Pattern Anal. Mach.*  
730 *Intell.* **1998**, *20*, 226–239, doi:10.1109/34.667881.
- 731 5. Stevenson, R.A.; Ghose, D.; Fister, J.K.; Sarko, D.K.; Altieri, N.A.; Nidiffer, A.R.; Kurela, L.A.R.;  
732 Siemann, J.K.; James, T.W.; Wallace, M.T. Identifying and Quantifying Multisensory Integration: A

- 733 Tutorial Review. *Brain Topogr.* **2014**, *27*, 707–730, doi:10.1007/s10548-014-0365-7.
- 734 6. Reeves, L.M.; Schmorrow, D.D.; Stanney, K.M. Augmented cognition and cognitive state assessment  
735 technology - Near-term, mid-term, and long-term research objectives. *Lect. Notes Comput. Sci. (including*  
736 *Subser. Lect. Notes Artif. Intell. Lect. Notes Bioinformatics)* **2007**, *4565 LNAI*, 220–228.
- 737 7. Jimenez-Molina, A.; Retamal, C.; Lira, H. Using psychophysiological sensors to assess mental  
738 workload during web browsing. *Sensors (Switzerland)* **2018**, *18*, 1–26, doi:10.3390/s18020458.
- 739 8. Born, J.; Ramachandran, B.R.N.; Romero Pinto, S.A.; Winkler, S.; Ratnam, R. Multimodal study of the  
740 effects of varying task load utilizing EEG, GSR and eye-tracking. *bioRxiv* **2019**, 798496,  
741 doi:10.1101/798496.
- 742 9. Leontyev, A.; Yamauchi, T.; Razavi, M. Machine Learning Stop Signal Test (ML-SST): ML-based Mouse  
743 Tracking Enhances Adult ADHD Diagnosis. In Proceedings of the 2019 8th International Conference  
744 on Affective Computing and Intelligent Interaction Workshops and Demos, ACIIW 2019; Institute of  
745 Electrical and Electronics Engineers Inc., 2019; pp. 248–252.
- 746 10. Leontyev, A.; Sun, S.; Wolfe, M.; Yamauchi, T. Augmented Go/No-Go Task: Mouse Cursor Motion  
747 Measures Improve ADHD Symptom Assessment in Healthy College Students. *Front. Psychol.* **2018**, *9*,  
748 496, doi:10.3389/fpsyg.2018.00496.
- 749 11. Leontyev, A.; Yamauchi, T. Mouse movement measures enhance the stop-signal task in adult ADHD  
750 assessment. *PLoS One* **2019**, *14*, e0225437, doi:10.1371/journal.pone.0225437.
- 751 12. Yamauchi, T.; Xiao, K. Reading Emotion From Mouse Cursor Motions: Affective Computing  
752 Approach. *Cogn. Sci.* **2018**, *42*, 771–819, doi:10.1111/cogs.12557.
- 753 13. Yamauchi, T.; Leontyev, A.; Razavi, M. Assessing Emotion by Mouse-cursor Tracking: Theoretical and  
754 Empirical Rationales. In Proceedings of the 2019 8th International Conference on Affective Computing  
755 and Intelligent Interaction, ACII 2019; Institute of Electrical and Electronics Engineers Inc., 2019; pp.  
756 89–95.
- 757 14. Yamauchi, T.; Seo, J.; Sungkajun, A. Interactive Plants: Multisensory Visual-Tactile Interaction  
758 Enhances Emotional Experience. *Mathematics* **2018**, *6*, 225, doi:10.3390/math6110225.
- 759 15. Chen, F.; Ruiz, N.; Choi, E.; Epps, J.; Khawaja, M.A.; Taib, R.; Yin, B.; Wang, Y. Multimodal behavior  
760 and interaction as indicators of cognitive load. *ACM Trans. Interact. Intell. Syst.* **2012**, *2*,  
761 doi:10.1145/2395123.2395127.
- 762 16. Lazzeri, N.; Mazzei, D.; De Rossi, D. Development and Testing of a Multimodal Acquisition Platform  
763 for Human-Robot Interaction Affective Studies. *J. Human-Robot Interact.* **2014**, *3*, 1,  
764 doi:10.5898/jhri.3.2.lazzeri.
- 765 17. Charles, R.L.; Nixon, J. Measuring mental workload using physiological measures: A systematic  
766 review. *Appl. Ergon.* **2019**, *74*, 221–232.
- 767 18. Lohani, M.; Payne, B.R.; Strayer, D.L. A review of psychophysiological measures to assess cognitive  
768 states in real-world driving. *Front. Hum. Neurosci.* **2019**, *13*, 1–27, doi:10.3389/fnhum.2019.00057.
- 769 19. Gibson, B.E.; King, G.; Kushki, A.; Mistry, B.; Thompson, L.; Teachman, G.; Batorowicz, B.; McMMain-  
770 Klein, M. A multi-method approach to studying activity setting participation: Integrating standardized  
771 questionnaires, qualitative methods and physiological measures. *Disabil. Rehabil.* **2014**, *36*, 1652–1660,  
772 doi:10.3109/09638288.2013.863393.
- 773 20. Sciarini, L.W.; Nicholson, D. Assessing cognitive state with multiple physiological measures: A  
774 modular approach. *Lect. Notes Comput. Sci. (including Subser. Lect. Notes Artif. Intell. Lect. Notes*  
775 *Bioinformatics)* **2009**, *5638 LNAI*, 533–542, doi:10.1007/978-3-642-02812-0\_62.

- 776 21. Wang, Z.; Healy, G.; Smeaton, A.F.; Ward, T.E. An investigation of triggering approaches for the rapid  
777 serial visual presentation paradigm in brain computer interfacing. *2016 27th Irish Signals Syst. Conf.*  
778 *ISSC 2016* **2016**, 1–6, doi:10.1109/ISSC.2016.7528466.
- 779 22. Peirce, J.W. PsychoPy-Psychophysics software in Python. *J. Neurosci. Methods* **2007**, *162*, 8–13,  
780 doi:10.1016/j.jneumeth.2006.11.017.
- 781 23. Peirce, J.W. Generating stimuli for neuroscience using PsychoPy. *Front. Neuroinform.* **2009**, *2*,  
782 doi:10.3389/neuro.11.010.2008.
- 783 24. Yamauchi, T.; Xiao, K.; Bowman, C.; Mueen, A. Dynamic time warping: A single dry electrode EEG  
784 study in a self-paced learning task. In Proceedings of the 2015 International Conference on Affective  
785 Computing and Intelligent Interaction, ACII 2015; Institute of Electrical and Electronics Engineers Inc.,  
786 2015; pp. 56–62.
- 787 25. Ojeda, A.; Bigdely-Shamlo, N.; Makeig, S. MoBILAB: An open source toolbox for analysis and  
788 visualization of mobile brain/body imaging data. *Front. Hum. Neurosci.* **2014**, *8*, 1–9,  
789 doi:10.3389/fnhum.2014.00121.
- 790 26. Abiri, R.; Borhani, S.; Sellers, E.W.; Jiang, Y.; Zhao, X. A comprehensive review of EEG-based brain-  
791 computer interface paradigms. *J. Neural Eng.* 2019, *16*, 011001.
- 792 27. Marsja, E.; Marsh, J.E.; Hansson, P.; Neely, G. Examining the role of spatial changes in bimodal and  
793 uni-modal to-be-ignored stimuli and how they affect short-term memory processes. *Front. Psychol.*  
794 **2019**, *10*, 1–8, doi:10.3389/fpsyg.2019.00299.
- 795 28. Gao, J.; Li, P.; Chen, Z.; Zhang, J. A survey on deep learning for multimodal data fusion. *Neural*  
796 *Comput.* **2020**, *32*, 829–864, doi:10.1162/neco\_a\_01273.
- 797
